# Supplementary material
Source: publisher figshare collection journal article supplement (https://frontiersin.figshare.com/ndownloader/files/18946616)
Supplement: Supplementary file 1 [file 18946616]

Archive with 33 entries (30 files):
- Supplementary_data_figures/
- Supplementary_data_figures/Figure_1.tiff
- __MACOSX/
- __MACOSX/Supplementary_data_figures/
- __MACOSX/Supplementary_data_figures/._Figure_1.tiff
- Supplementary_data_figures/FIgure_10.tiff
- __MACOSX/Supplementary_data_figures/._FIgure_10.tiff
- Supplementary_data_figures/Figure_11.tiff
- __MACOSX/Supplementary_data_figures/._Figure_11.tiff
- Supplementary_data_figures/Figure_12.tiff
- __MACOSX/Supplementary_data_figures/._Figure_12.tiff
- Supplementary_data_figures/Figure_13.tiff
- __MACOSX/Supplementary_data_figures/._Figure_13.tiff
- Supplementary_data_figures/Figure_14.tiff
- __MACOSX/Supplementary_data_figures/._Figure_14.tiff
- Supplementary_data_figures/Figure_2.tiff
- __MACOSX/Supplementary_data_figures/._Figure_2.tiff
- Supplementary_data_figures/Figure_3.tiff
- __MACOSX/Supplementary_data_figures/._Figure_3.tiff
- Supplementary_data_figures/Figure_4.tiff
- __MACOSX/Supplementary_data_figures/._Figure_4.tiff
- Supplementary_data_figures/Figure_5.tiff
- __MACOSX/Supplementary_data_figures/._Figure_5.tiff
- Supplementary_data_figures/Figure_6.tiff
- __MACOSX/Supplementary_data_figures/._Figure_6.tiff
- Supplementary_data_figures/Figure_7.tiff
- __MACOSX/Supplementary_data_figures/._Figure_7.tiff
- Supplementary_data_figures/Figure_8.tiff
- __MACOSX/Supplementary_data_figures/._Figure_8.tiff
- Supplementary_data_figures/Figure_9.tiff
- __MACOSX/Supplementary_data_figures/._Figure_9.tiff
- Supplementary_data_figures/Supplementary data figure captions.docx
- __MACOSX/Supplementary_data_figures/._Supplementary data figure captions.docx
