# Supplementary material
Source: publisher figshare collection journal article supplement (https://frontiersin.figshare.com/ndownloader/files/18946616)
Supplement: Supplementary file 1 [file 18946616 › Supplementary_data_figures/Supplementary data figure captions.docx]

**Supplementary data figure captions**

**Figure 1. (A) Predicted structure of DNMT, MBD and TET proteins in stickleback.** Diagrams show the conserved domain organization of putative proteins encoded by sticklebacksequences. Protein names and protein primary sequence lengthss are indicated. **(B)** **Phylogenetic analysis of stickleback DNMT proteins. (C)** **Phylogenetic analysis of stickleback MDB proteins. (D)** **Phylogenetic analysis of stickleback TET proteins.** Each phylogenetic tree shows stickleback protein families and their orthologues in mouse (*Mus musculus*), chicken (*Gallus gallus*), western clawed frog (*Xenopus tropicalis*), zebrafish (*Danio rerio*), medaka (*Oryzias latipes*), mangrove rivulus (*Kryptolebias marmoratus*), green spotted puffer (*Tetraodon nigroviridis*) and channel catfish (*Ictalurusu punctatus*). Numbers in the branches represent bootstrap values (%) from 500 replicates obtained using the Neighbor-joining method.

**Figure 2. (A) Predicted structure of PRMT proteins in stickleback.** Diagrams show the conserved domain organization of putative proteins encoded by sticklebacksequences. Protein names and protein primary sequence lengths are indicated. **(B)** **Summury of known PRMT biochemical activities and functions in mammals. (C) Phylogenetic analysis of stickleback PRMT proteins.** Phylogenetic tree shows stickleback PRMT families and their orthologues in mouse (*Mus musculus*), chicken (*Gallus gallus*), western clawed frog (*Xenopus tropicalis*), zebrafish (*Danio rerio*), medaka (*Oryzias latipes*), mangrove rivulus (*Kryptolebias marmoratus*), green spotted puffer (*Tetraodon nigroviridis*) and channel catfish (*Ictalurusu punctatus*). Numbers in the branches represent bootstrap values (%) from 500 replicates obtained using the Neighbor-joining method.

**Figure 3. (A) Predicted structure of KMT proteins in stickleback.** Diagrams show the conserved domain organization of putative proteins encoded by sticklebacksequences. Protein names and protein primary sequence lengths are indicated. **(B)** **Phylogenetic analysis of stickleback SET proteins. (C) Phylogenetic analysis of stickleback Dot1l.** Phylogenetic tree shows stickleback protein families and their orthologues in mouse (*Mus musculus*), chicken (*Gallus gallus*), western clawed frog (*Xenopus tropicalis*), zebrafish (*Danio rerio*), medaka (*Oryzias latipes*), mangrove rivulus (*Kryptolebias marmoratus*), green spotted puffer (*Tetraodon nigroviridis*) and channel catfish (*Ictalurusu punctatus*). Numbers in the branches represent bootstrap values (%) from 500 replicates obtained using the Neighbor-joining method. **(D)** **Summury of known KMT biochemical activities and functions in mammals.**

**Figure 4. (A) Predicted structure of KDM proteins in stickleback.** Diagrams show the conserved domain organization of putative proteins encoded by sticklebacksequences. Protein names and protein primary sequence lengths are indicated. **(B)** **Summury of known KDM biochemical activities and functions in mammals. (C) Phylogenetic analysis of stickleback KDM proteins.** Phylogenetic tree shows stickleback KDM families and their orthologues in mouse (*Mus musculus*), chicken (*Gallus gallus*), western clawed frog (*Xenopus tropicalis*), zebrafish (*Danio rerio*), medaka (*Oryzias latipes*), mangrove rivulus (*Kryptolebias marmoratus*), green spotted puffer (*Tetraodon nigroviridis*) and channel catfish (*Ictalurusu punctatus*). Numbers in the branches represent bootstrap values (%) from 500 replicates obtained using the Neighbor-joining method.

**Figure 5. (A) Predicted structure of HDAC/Sirtuin proteins in stickleback.** Diagrams show the conserved domain organization of putative proteins encoded by sticklebacksequences. Protein names and protein primary sequence lengths are indicated. **(B)** **Summury of known HDAC/Sirtuin biochemical activities and functions in mammals. (C) Phylogenetic analysis of stickleback classical HDAC proteins. (D) Phylogenetic analysis of stickleback Sirtuin proteins.** Phylogenetic tree shows stickleback protein families and their orthologues in mouse (*Mus musculus*), chicken (*Gallus gallus*), western clawed frog (*Xenopus tropicalis*), zebrafish (*Danio rerio*), medaka (*Oryzias latipes*), mangrove rivulus (*Kryptolebias marmoratus*), green spotted puffer (*Tetraodon nigroviridis*) and channel catfish (*Ictalurusu punctatus*). Numbers in the branches represent bootstrap values (%) from 500 replicates obtained using the Neighbor-joining method.

**Figure 6. (A) Predicted structure of KAT proteins in stickleback.** Diagrams show the conserved domain organization of putative proteins encoded by sticklebacksequences. Protein names and protein primary sequence lengths are indicated. **(B)** **Summury of known KAT biochemical activities and functions in mammals. (C) Phylogenetic analysis of stickleback KAT proteins.** Phylogenetic tree shows stickleback protein families and their orthologues in mouse (*Mus musculus*), chicken (*Gallus gallus*), western clawed frog (*Xenopus tropicalis*), zebrafish (*Danio rerio*), medaka (*Oryzias latipes*), mangrove rivulus (*Kryptolebias marmoratus*), green spotted puffer (*Tetraodon nigroviridis*) and channel catfish (*Ictalurusu punctatus*). Numbers in the branches represent bootstrap values (%) from 500 replicates obtained using the Neighbor-joining method.

**Figure 7. (A) Predicted structure of histone kinase proteins in stickleback.** Diagrams show the conserved domain organization of putative proteins encoded by sticklebacksequences. Protein names and protein primary sequence lengths are indicated. **(B)** **Summury of known histone kinase biochemical activities and functions in mammals. (C) Phylogenetic analysis of stickleback histone kinase proteins.** Phylogenetic tree shows stickleback protein families and their orthologues in mouse (*Mus musculus*), chicken (*Gallus gallus*), western clawed frog (*Xenopus tropicalis*), zebrafish (*Danio rerio*), medaka (*Oryzias latipes*), mangrove rivulus (*Kryptolebias marmoratus*), green spotted puffer (*Tetraodon nigroviridis*) and channel catfish (*Ictalurusu punctatus*). Numbers in the branches represent bootstrap values (%) from 500 replicates obtained using the Neighbor-joining method.

**Figure 8. (A) Predicted structure of Ubiquitin E1, E2, E3 proteins in stickleback.** Diagrams show the conserved domain organization of putative proteins encoded by sticklebacksequences. Protein names and protein primary sequence lengths are indicated. **(B)** **Summury of known Ubiquitin E1, E2, E3 biochemical activities and functions in mammals. (C) Phylogenetic analysis of stickleback E3 proteins. (D) Phylogenetic analysis of stickleback E2 proteins. (E) Phylogenetic analysis of stickleback SWISS E3 proteins.** Phylogenetic tree shows stickleback protein families and their orthologues in mouse (*Mus musculus*), chicken (*Gallus gallus*), western clawed frog (*Xenopus tropicalis*), zebrafish (*Danio rerio*), medaka (*Oryzias latipes*), mangrove rivulus (*Kryptolebias marmoratus*), green spotted puffer (*Tetraodon nigroviridis*) and channel catfish (*Ictalurusu punctatus*). Numbers in the branches represent bootstrap values (%) from 500 replicates obtained using the Neighbor-joining method.

**Figure 9. (A) Predicted structure of deubiquitination enzymes** **in stickleback.** Diagrams show the conserved domain organization of putative proteins encoded by sticklebacksequences. Protein names and protein primary sequence lengths are indicated. **(B)** **Summury of known deubiquitination enzyme** **biochemical activities and functions in mammals. (C) Phylogenetic analysis of stickleback deubiquitination enzymes. (D) Phylogenetic analysis of stickleback BCC36 and MYSM1 proteins. (E) Phylogenetic analysis of stickleback BAP1 protein.** Phylogenetic tree shows stickleback protein families and their orthologues in mouse (*Mus musculus*), chicken (*Gallus gallus*), western clawed frog (*Xenopus tropicalis*), zebrafish (*Danio rerio*), medaka (*Oryzias latipes*), mangrove rivulus (*Kryptolebias marmoratus*), green spotted puffer (*Tetraodon nigroviridis*) and channel catfish (*Ictalurusu punctatus*). Numbers in the branches represent bootstrap values (%) from 500 replicates obtained using the Neighbor-joining method.

**Figure 10. (A) Predicted structure of Poly(ADP-ribose)polymerases, (ADP-ribose)glycohydrolase and (ADP-ribose)glycohydrolase in stickleback.** Diagrams show the conserved domain organization of putative proteins encoded by sticklebacksequences. Protein names and protein primary sequence lengths are indicated. **(B)** **Phylogenetic analysis of stickleback Poly(ADP-ribose)polymerases. (C) Phylogenetic analysis of (ADP-ribose)glycohydrolase and (ADP-ribose)glycohydrolase in stickleback.** Phylogenetic tree shows stickleback protein families and their orthologues in mouse (*Mus musculus*), chicken (*Gallus gallus*), western clawed frog (*Xenopus tropicalis*), zebrafish (*Danio rerio*), medaka (*Oryzias latipes*), mangrove rivulus (*Kryptolebias marmoratus*), green spotted puffer (*Tetraodon nigroviridis*) and channel catfish (*Ictalurusu punctatus*). Numbers in the branches represent bootstrap values (%) from 500 replicates obtained using the Neighbor-joining method.

**Figure 11. Predicted structure and phylogenetic analyses of OGA and OGT proteins in stickleback.** Diagrams show the conserved domain organization of putative proteins encoded by sticklebacksequences. Protein names and protein primary sequence lengths are indicated. Phylogenetic tree shows stickleback protein families and their orthologues in mouse (*Mus musculus*), chicken (*Gallus gallus*), western clawed frog (*Xenopus tropicalis*), zebrafish (*Danio rerio*), medaka (*Oryzias latipes*), mangrove rivulus (*Kryptolebias marmoratus*), green spotted puffer (*Tetraodon nigroviridis*) and channel catfish (*Ictalurusu punctatus*). Numbers in the branches represent bootstrap values (%) from 500 replicates obtained using the Neighbor-joining method.

**Figure 12. (A) Predicted structure of SUMO proteins in stickleback. (B) Predicted structure of SENP proteins in stickleback.** Diagrams show the conserved domain organization of putative proteins encoded by sticklebacksequences. Protein names and protein primary sequence lengths are indicated. **(B)** **Phylogenetic analysis of stickleback SUMO proteins. (C) Phylogenetic analysis of the SENP proteins in stickleback.** Phylogenetic tree shows stickleback protein families and their orthologues in mouse (*Mus musculus*), chicken (*Gallus gallus*), western clawed frog (*Xenopus tropicalis*), zebrafish (*Danio rerio*), medaka (*Oryzias latipes*), mangrove rivulus (*Kryptolebias marmoratus*), green spotted puffer (*Tetraodon nigroviridis*) and channel catfish (*Ictalurusu punctatus*). Numbers in the branches represent bootstrap values (%) from 500 replicates obtained using the Neighbor-joining method.

**Figure 13. (1) Predicted structure of H2A and macroH2A variants in stickleback.** Diagrams show the conserved domain organization of putative proteins encoded by sticklebacksequences. Protein names and protein primary sequence lengths are indicated. **(2)** **Phylogenetic analysis of stickleback H2A and macroH2A variants.** Phylogenetic tree shows stickleback protein families and their orthologues in mouse (*Mus musculus*), chicken (*Gallus gallus*), western clawed frog (*Xenopus tropicalis*), zebrafish (*Danio rerio*), medaka (*Oryzias latipes*), mangrove rivulus (*Kryptolebias marmoratus*), green spotted puffer (*Tetraodon nigroviridis*) and channel catfish (*Ictalurusu punctatus*). Numbers in the branches represent bootstrap values (%) from 500 replicates obtained using the Neighbor-joining method.

**Figure 14. (A) Key proteins identified in mammals as implicated in miRNA biogenesis. (B) Key proteins identified in mammals as implicated in miRNA turnover.** (Adapted from (Best et al., 2018))
