# Supplementary material
Source: publisher figshare collection journal article supplement (https://frontiersin.figshare.com/ndownloader/files/18946616)

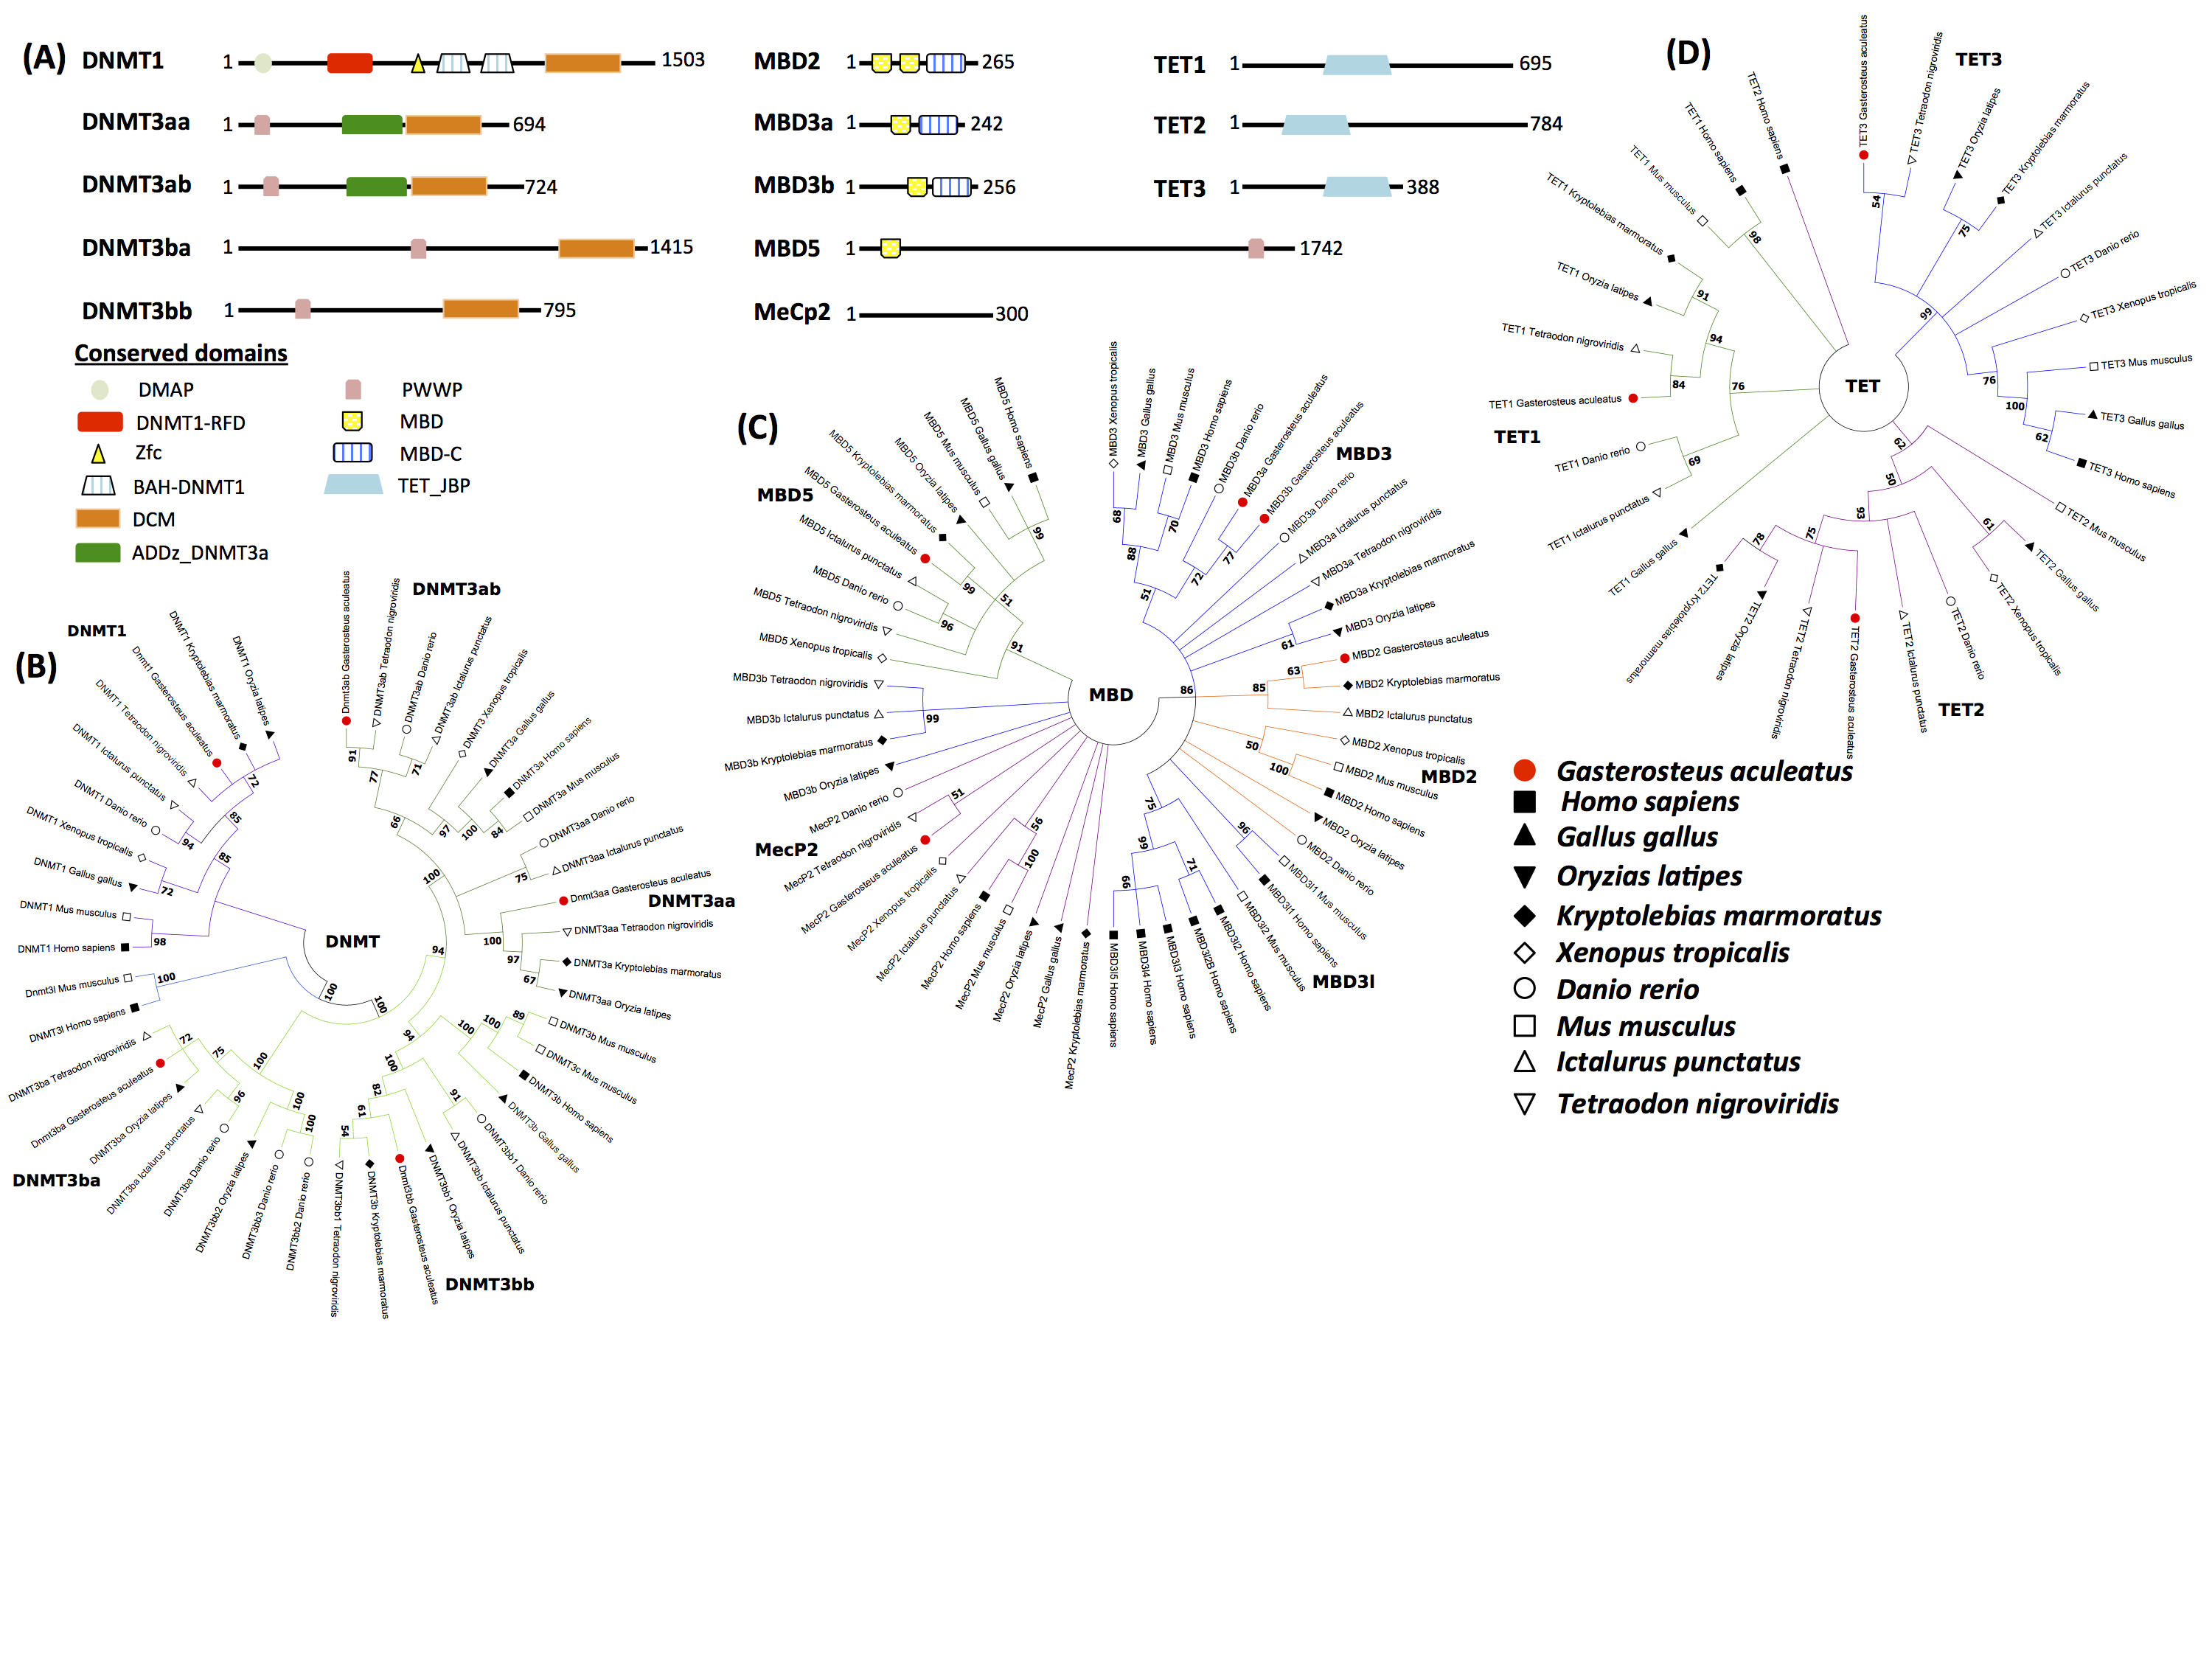

Supplement: Supplementary file 1 [file 18946616 › Supplementary_data_figures/Figure_1.tiff]

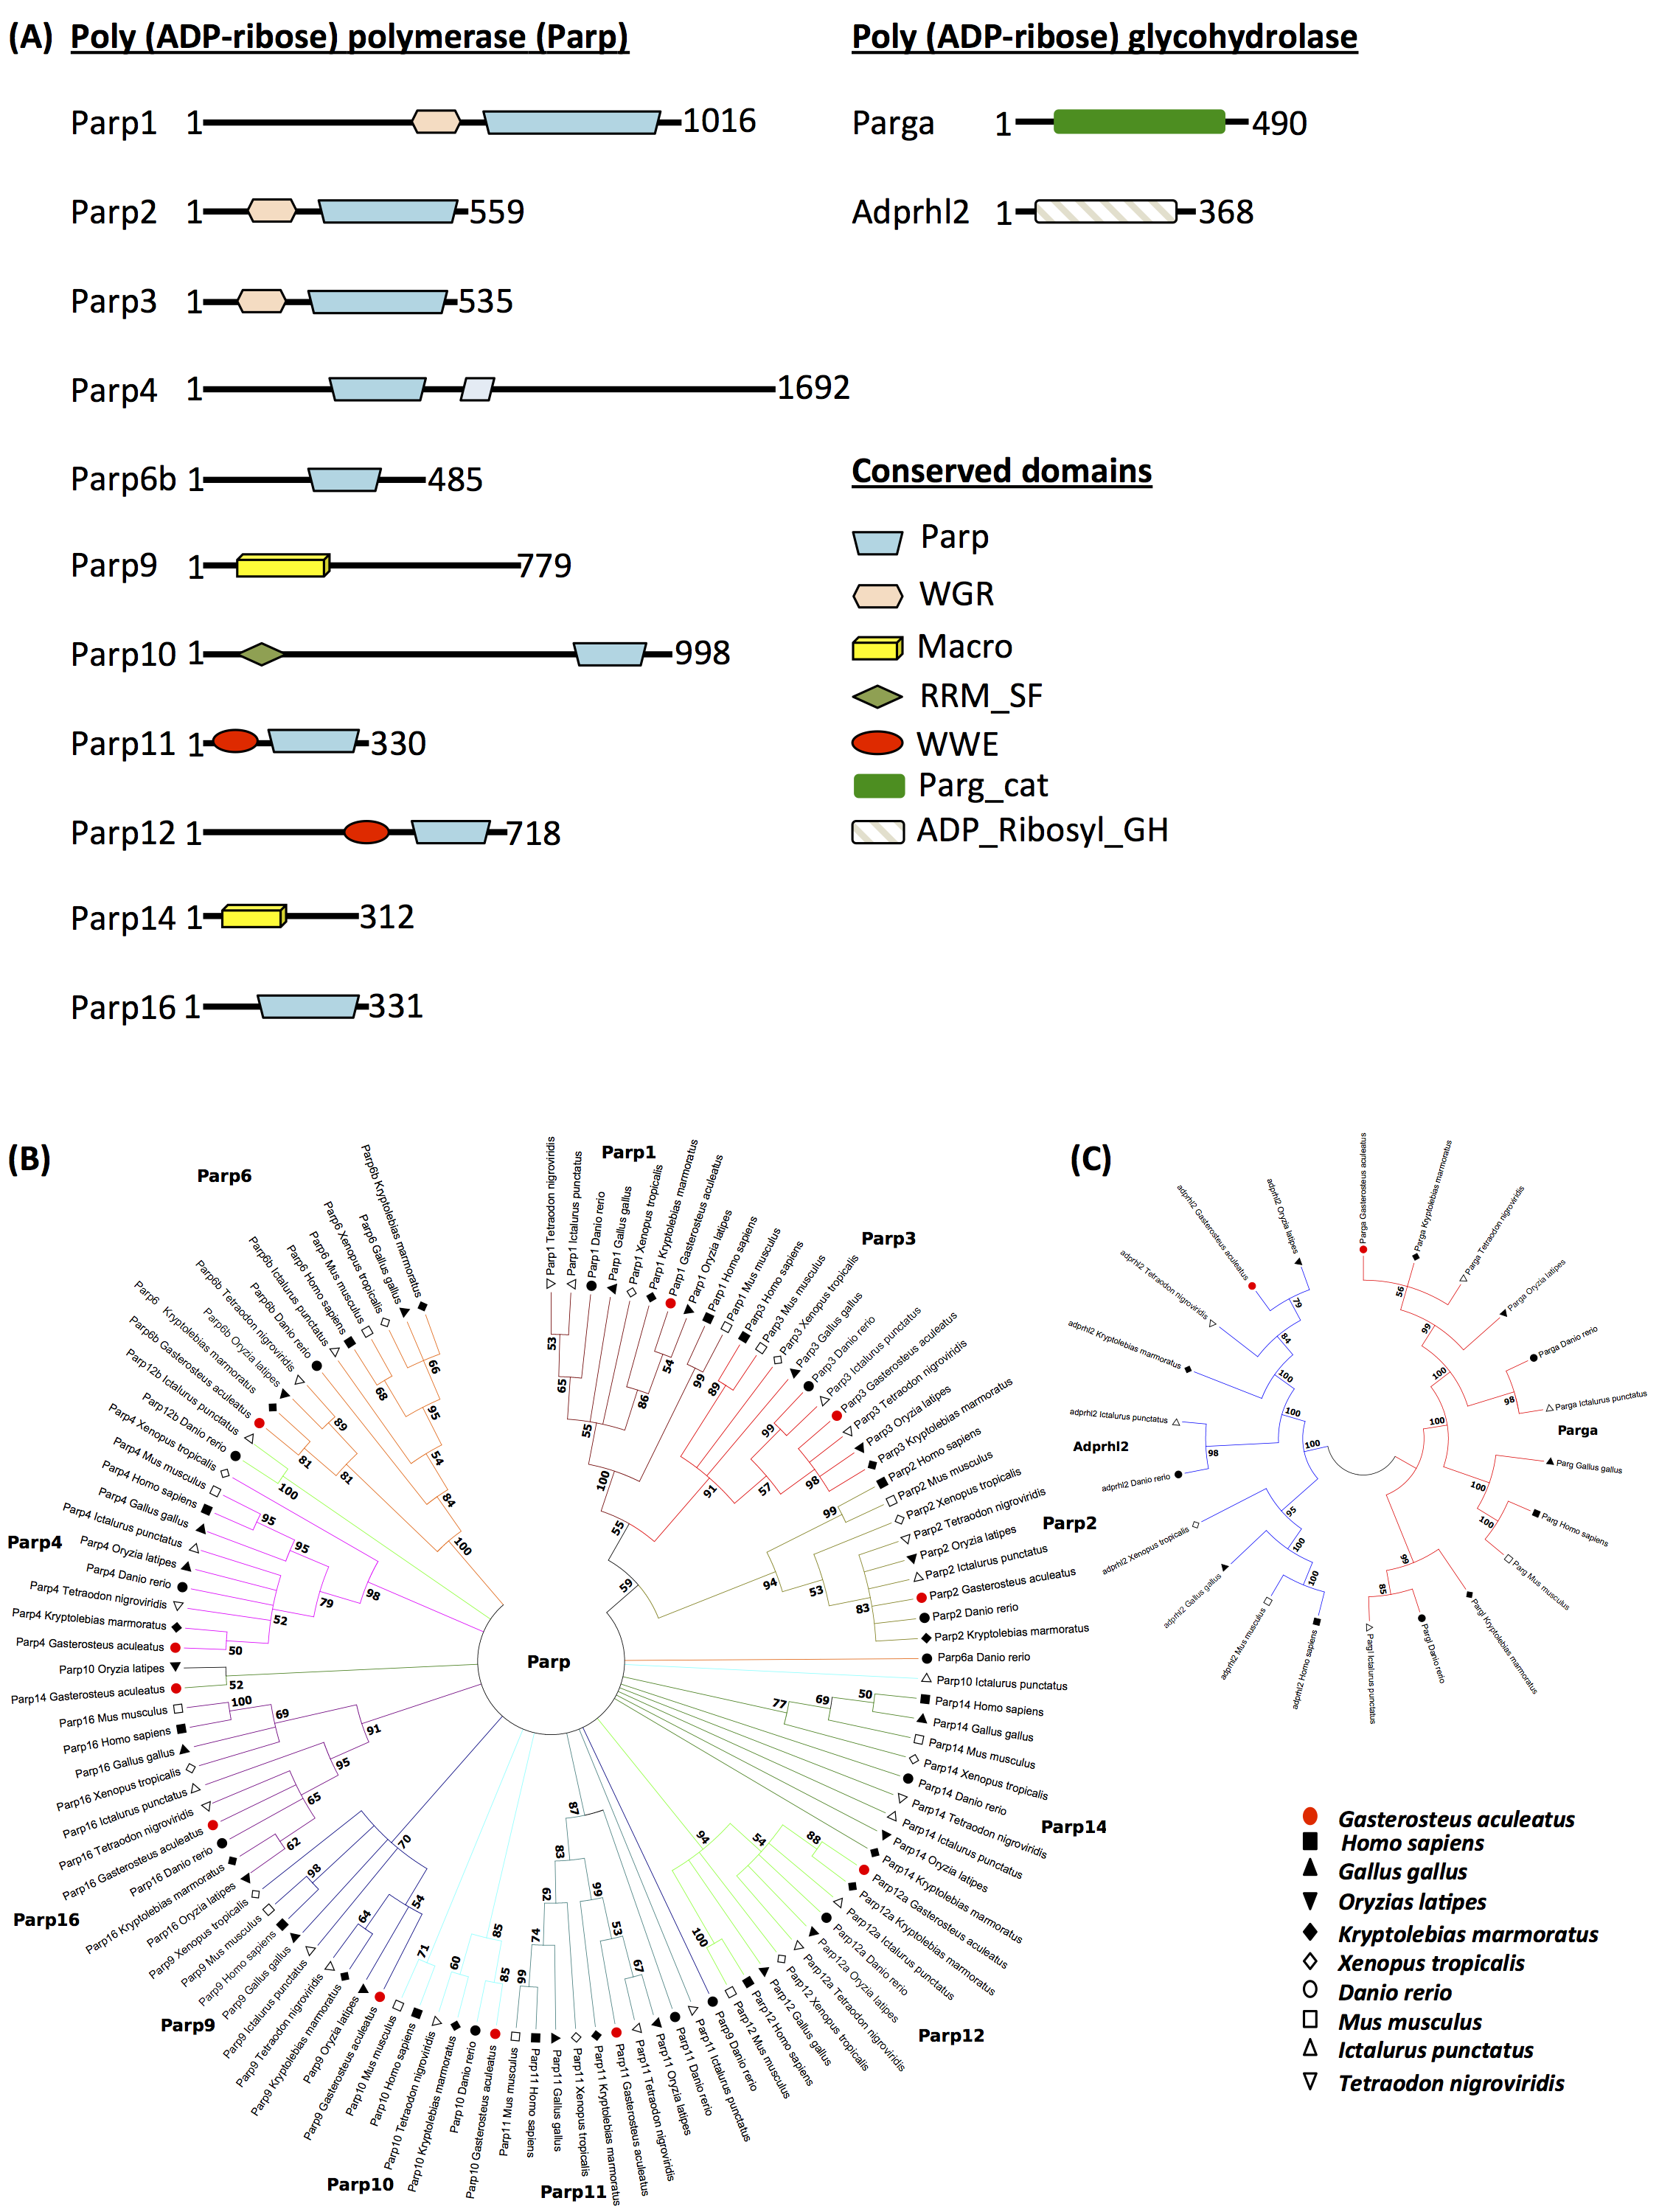

Supplement: Supplementary file 1 [file 18946616 › Supplementary_data_figures/FIgure_10.tiff]

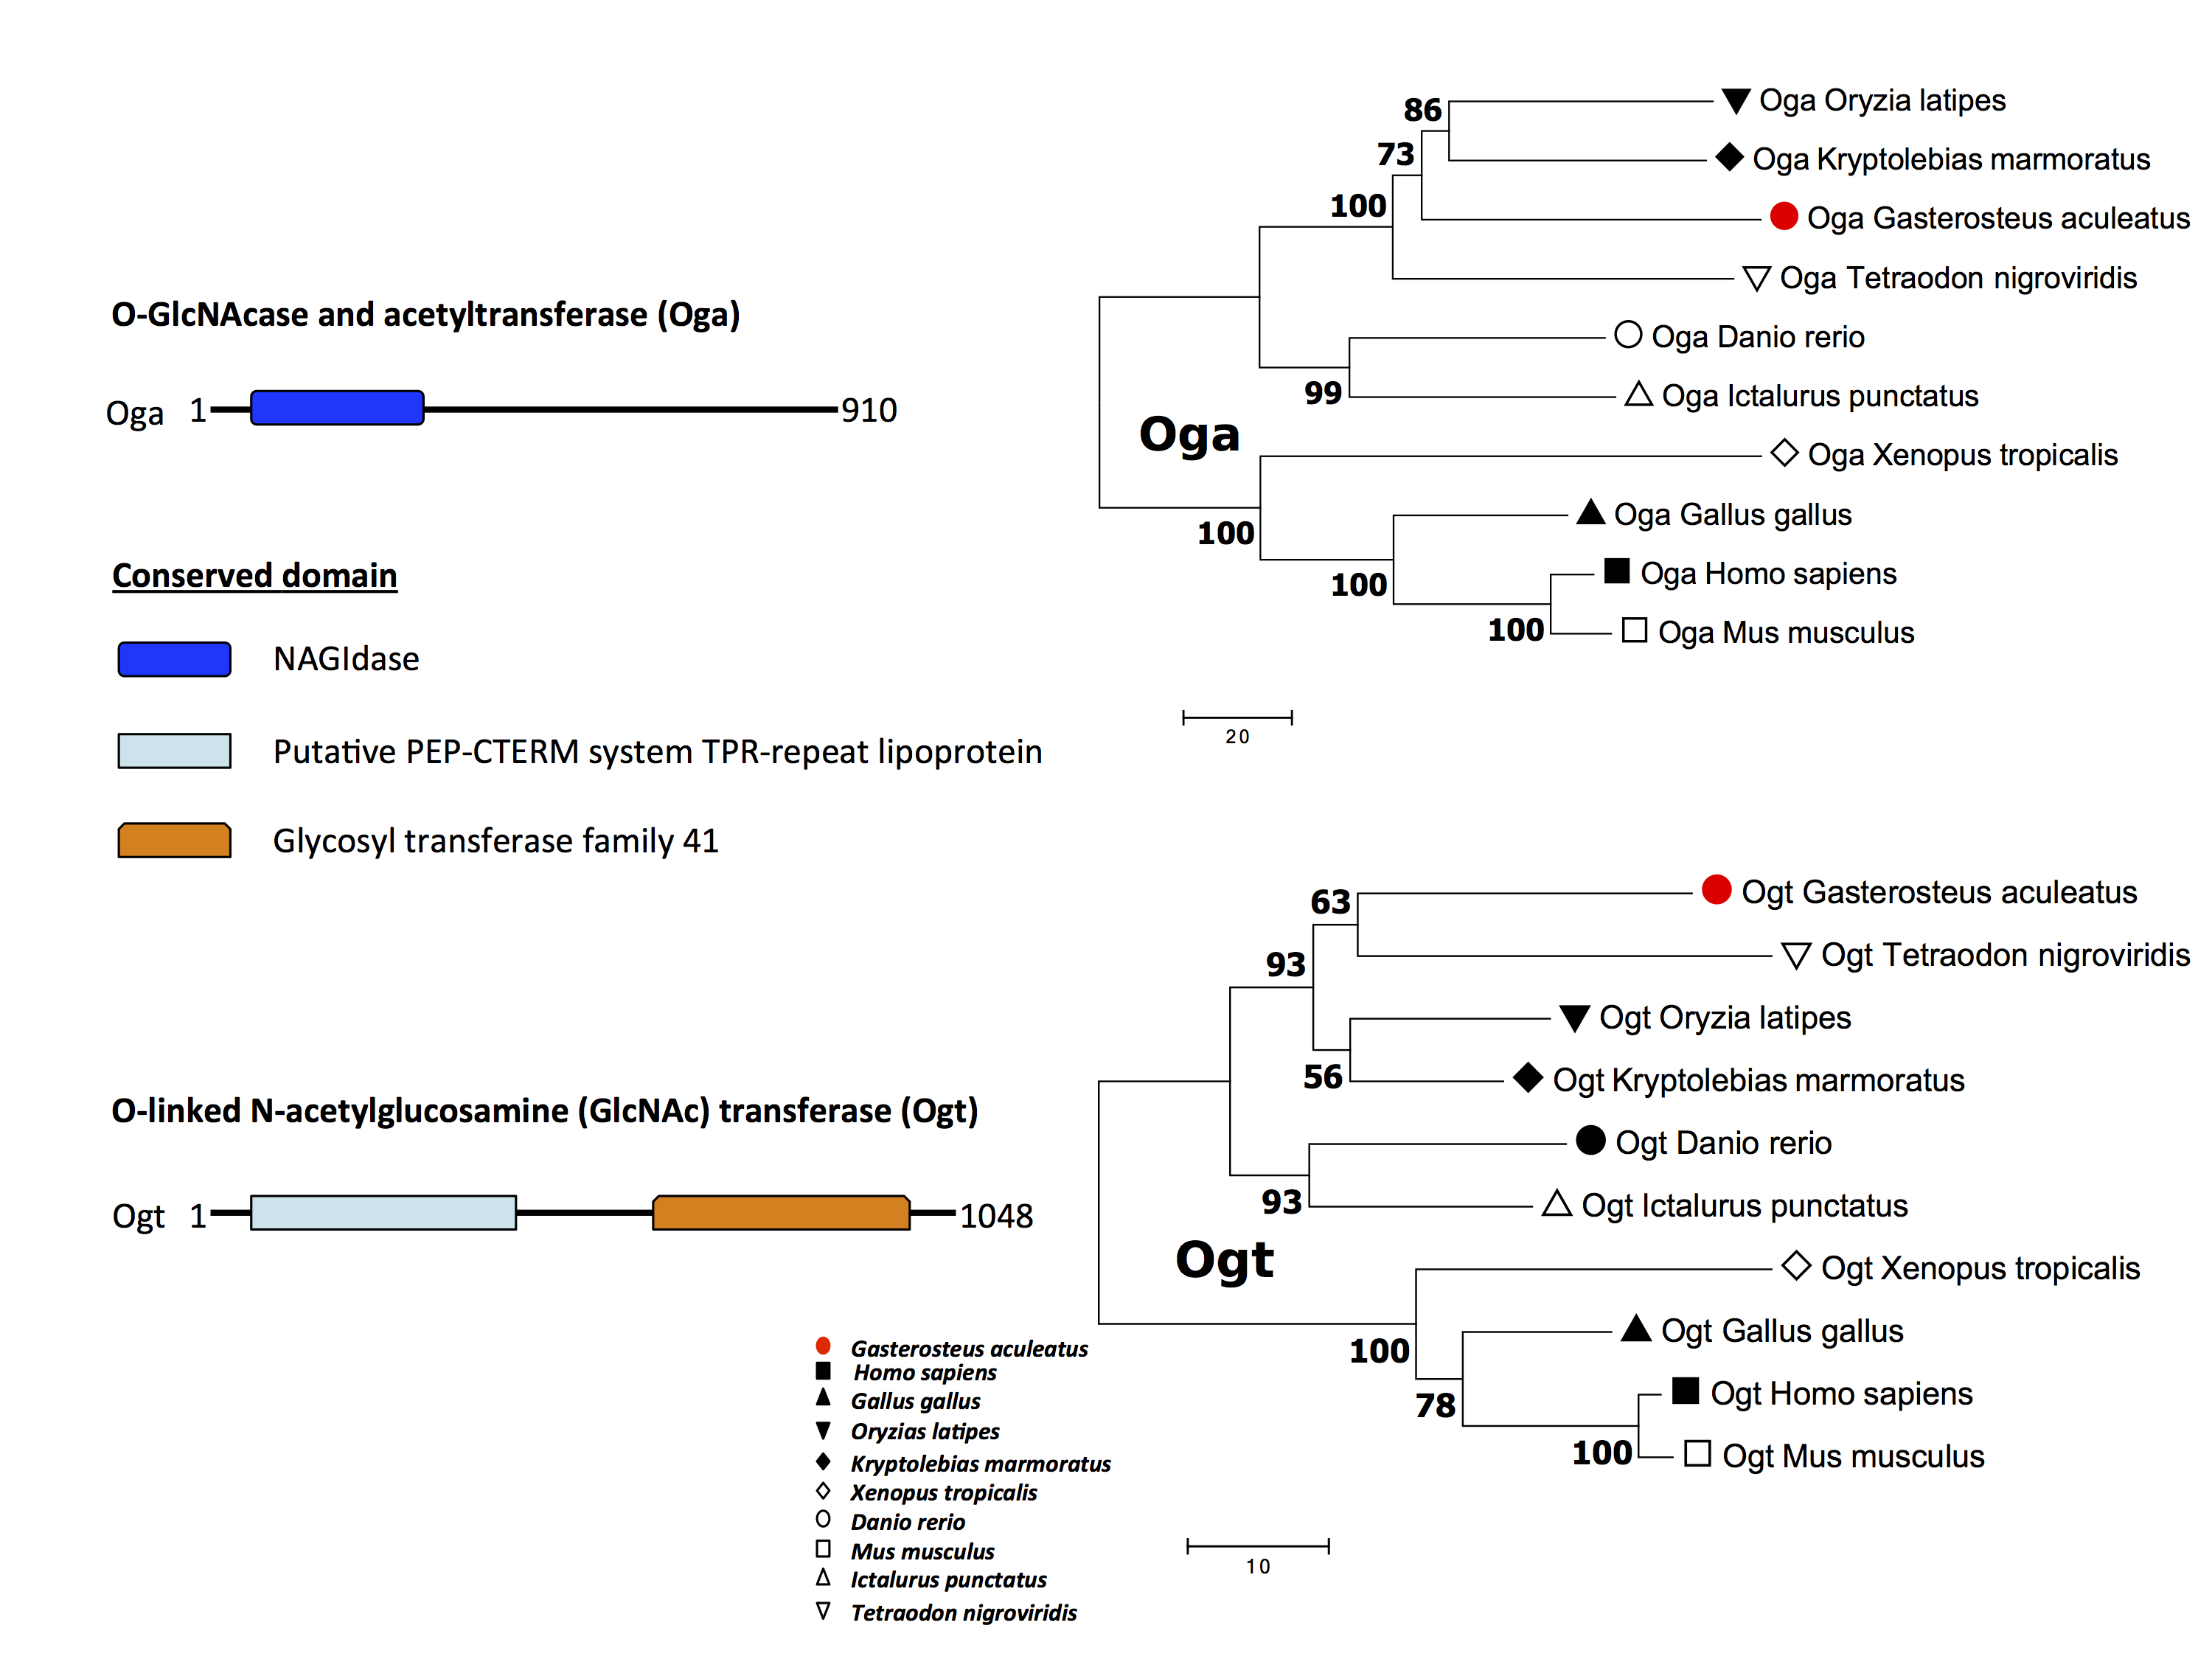

Supplement: Supplementary file 1 [file 18946616 › Supplementary_data_figures/Figure_11.tiff]

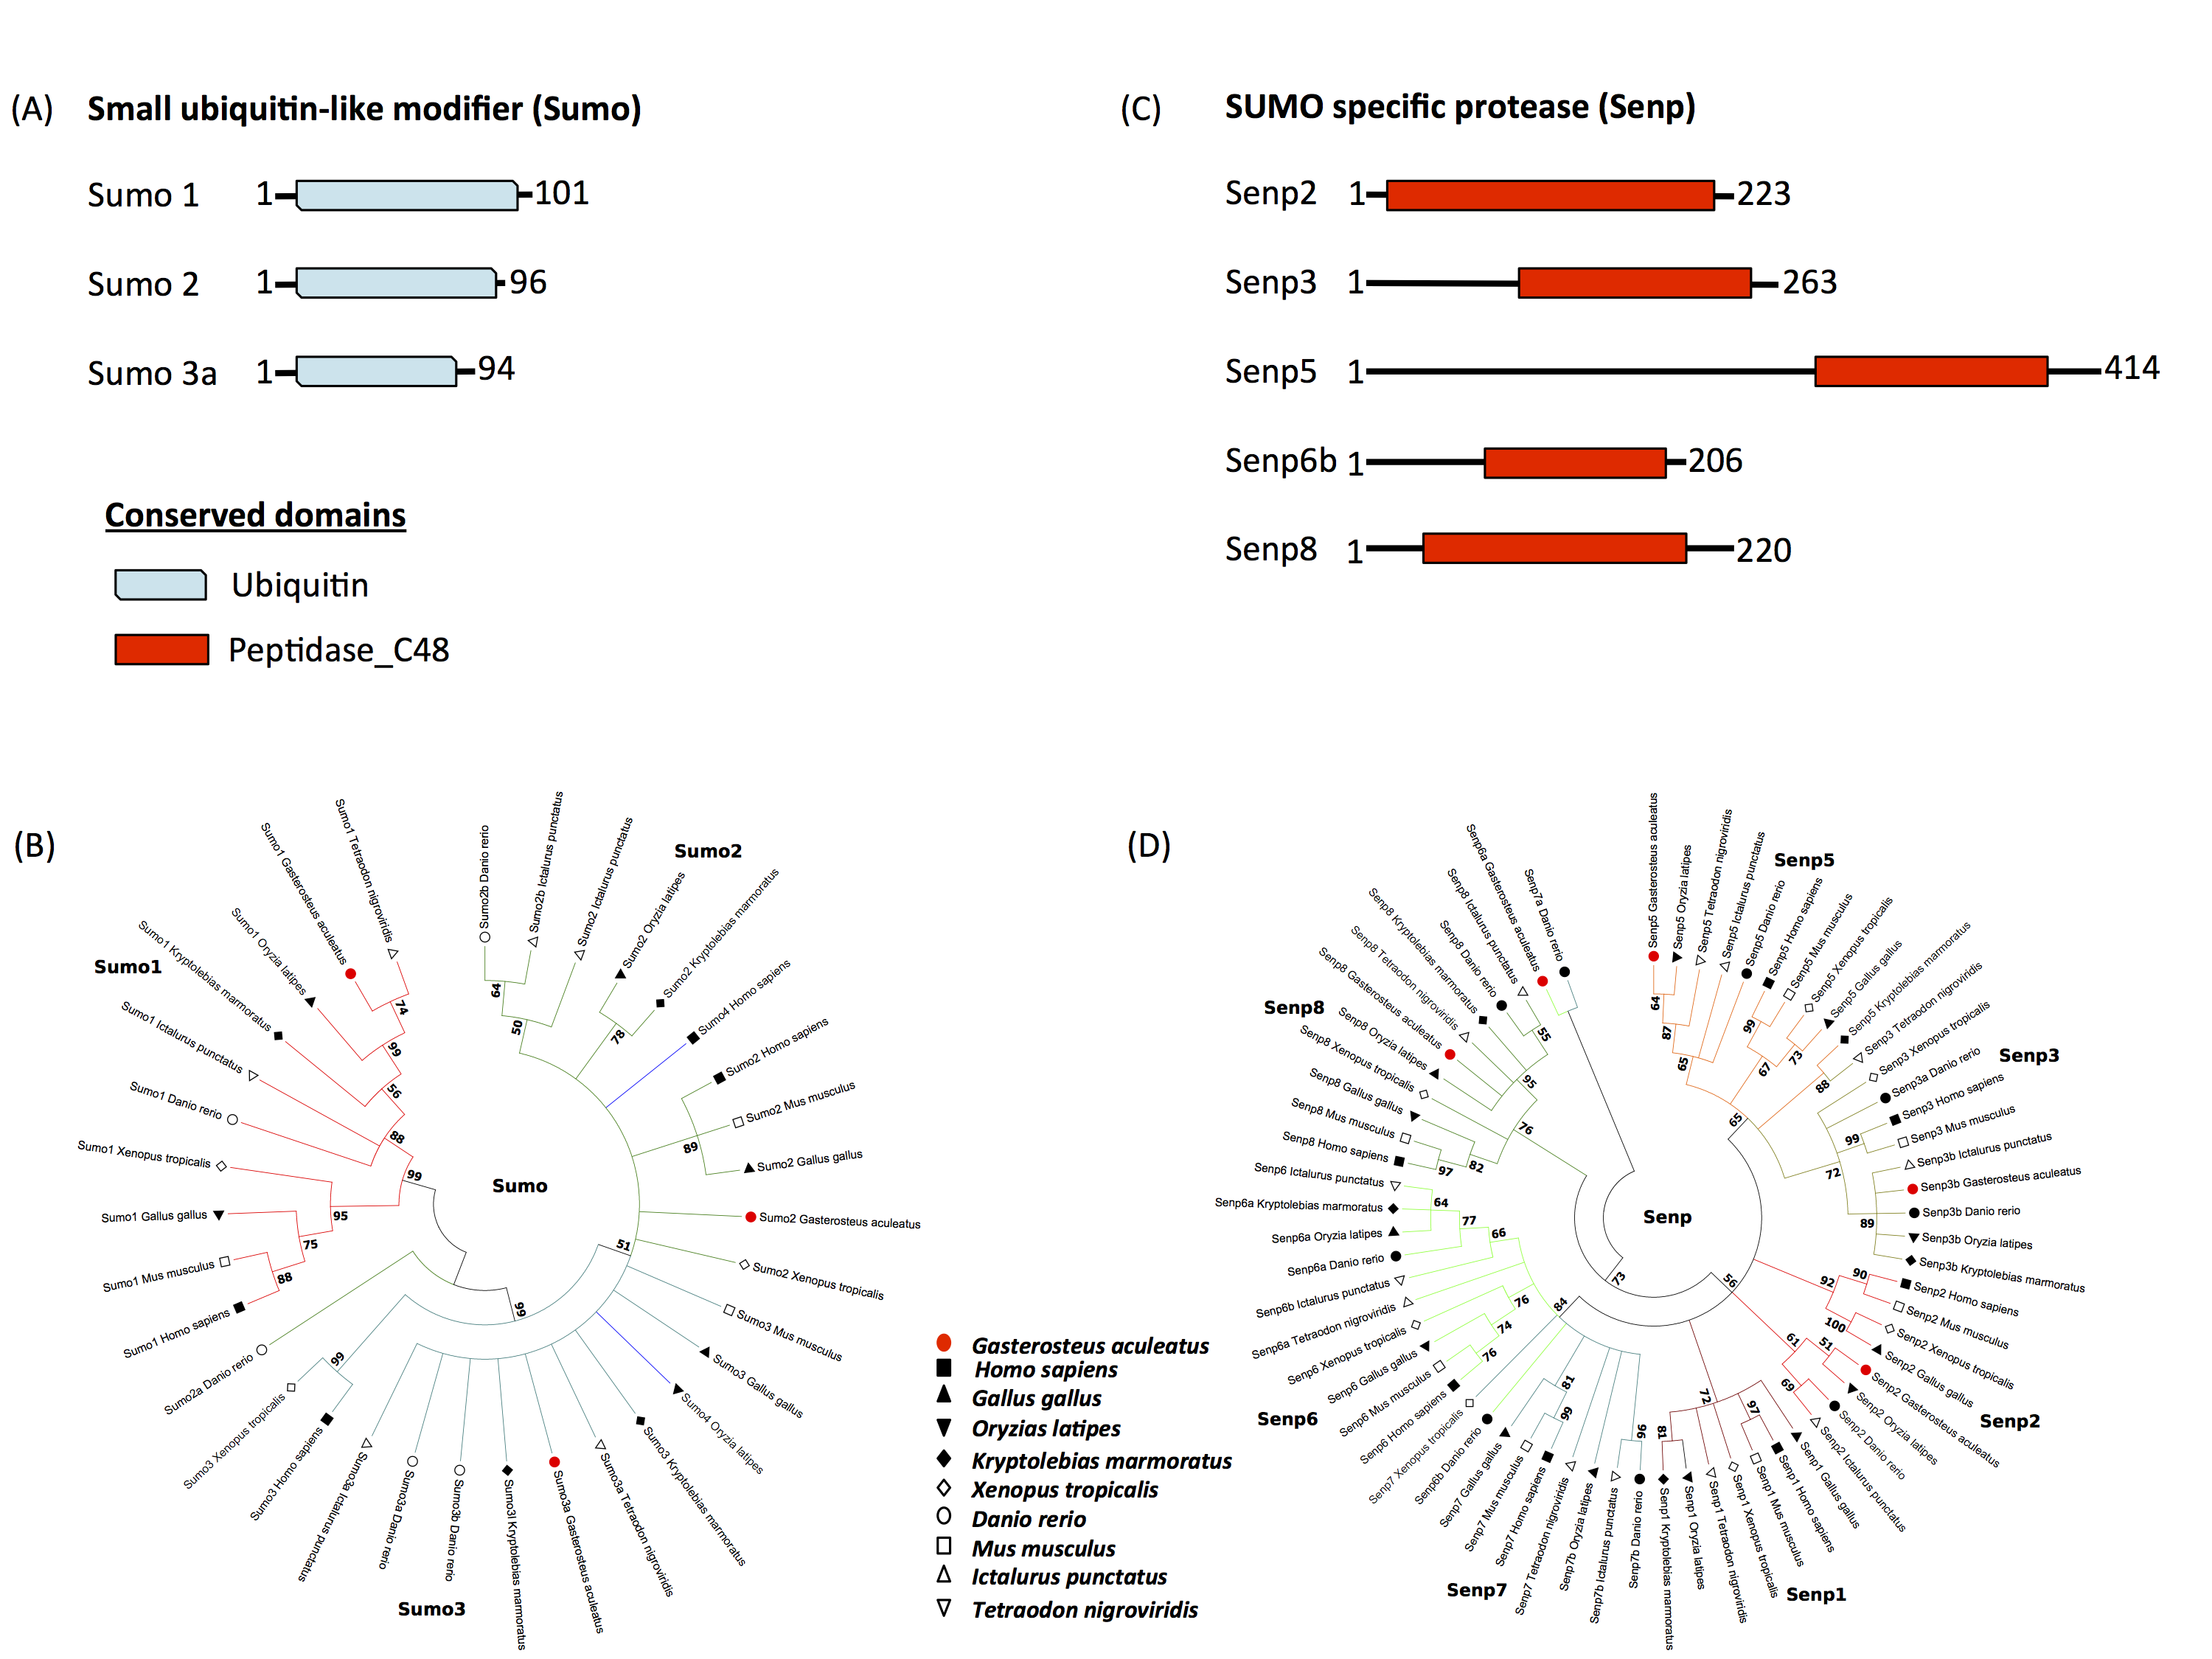

Supplement: Supplementary file 1 [file 18946616 › Supplementary_data_figures/Figure_12.tiff]

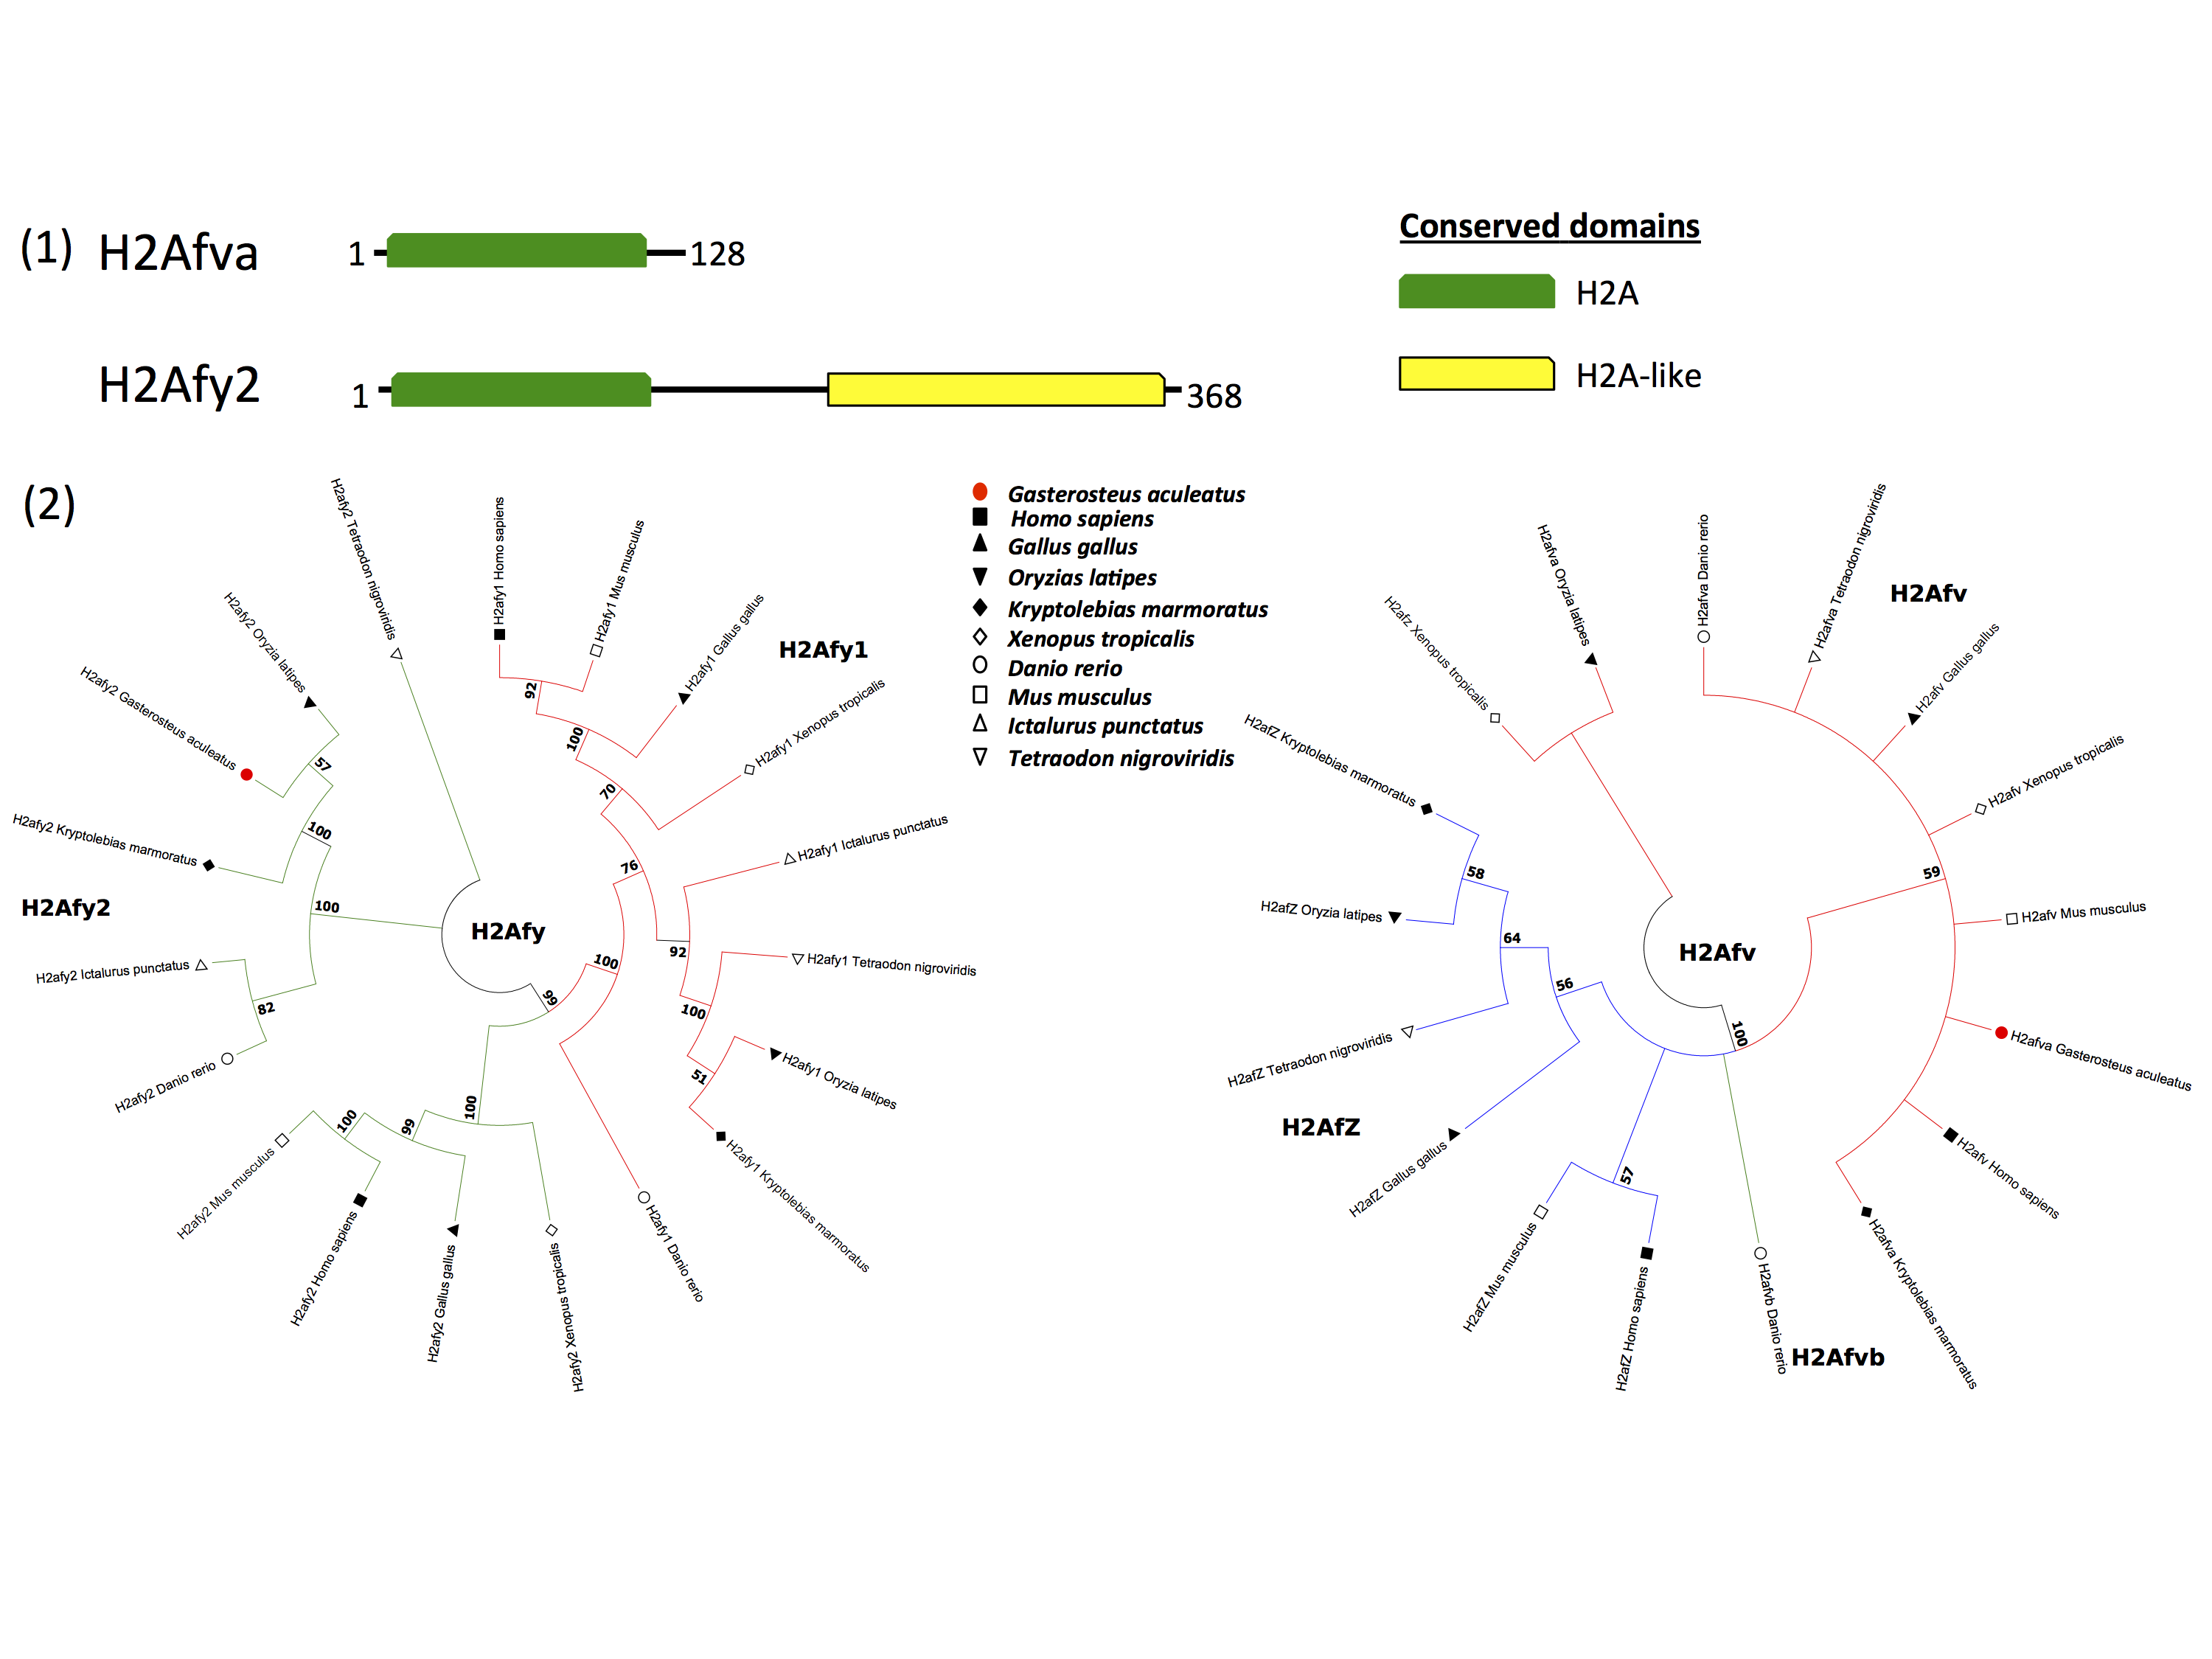

Supplement: Supplementary file 1 [file 18946616 › Supplementary_data_figures/Figure_13.tiff]

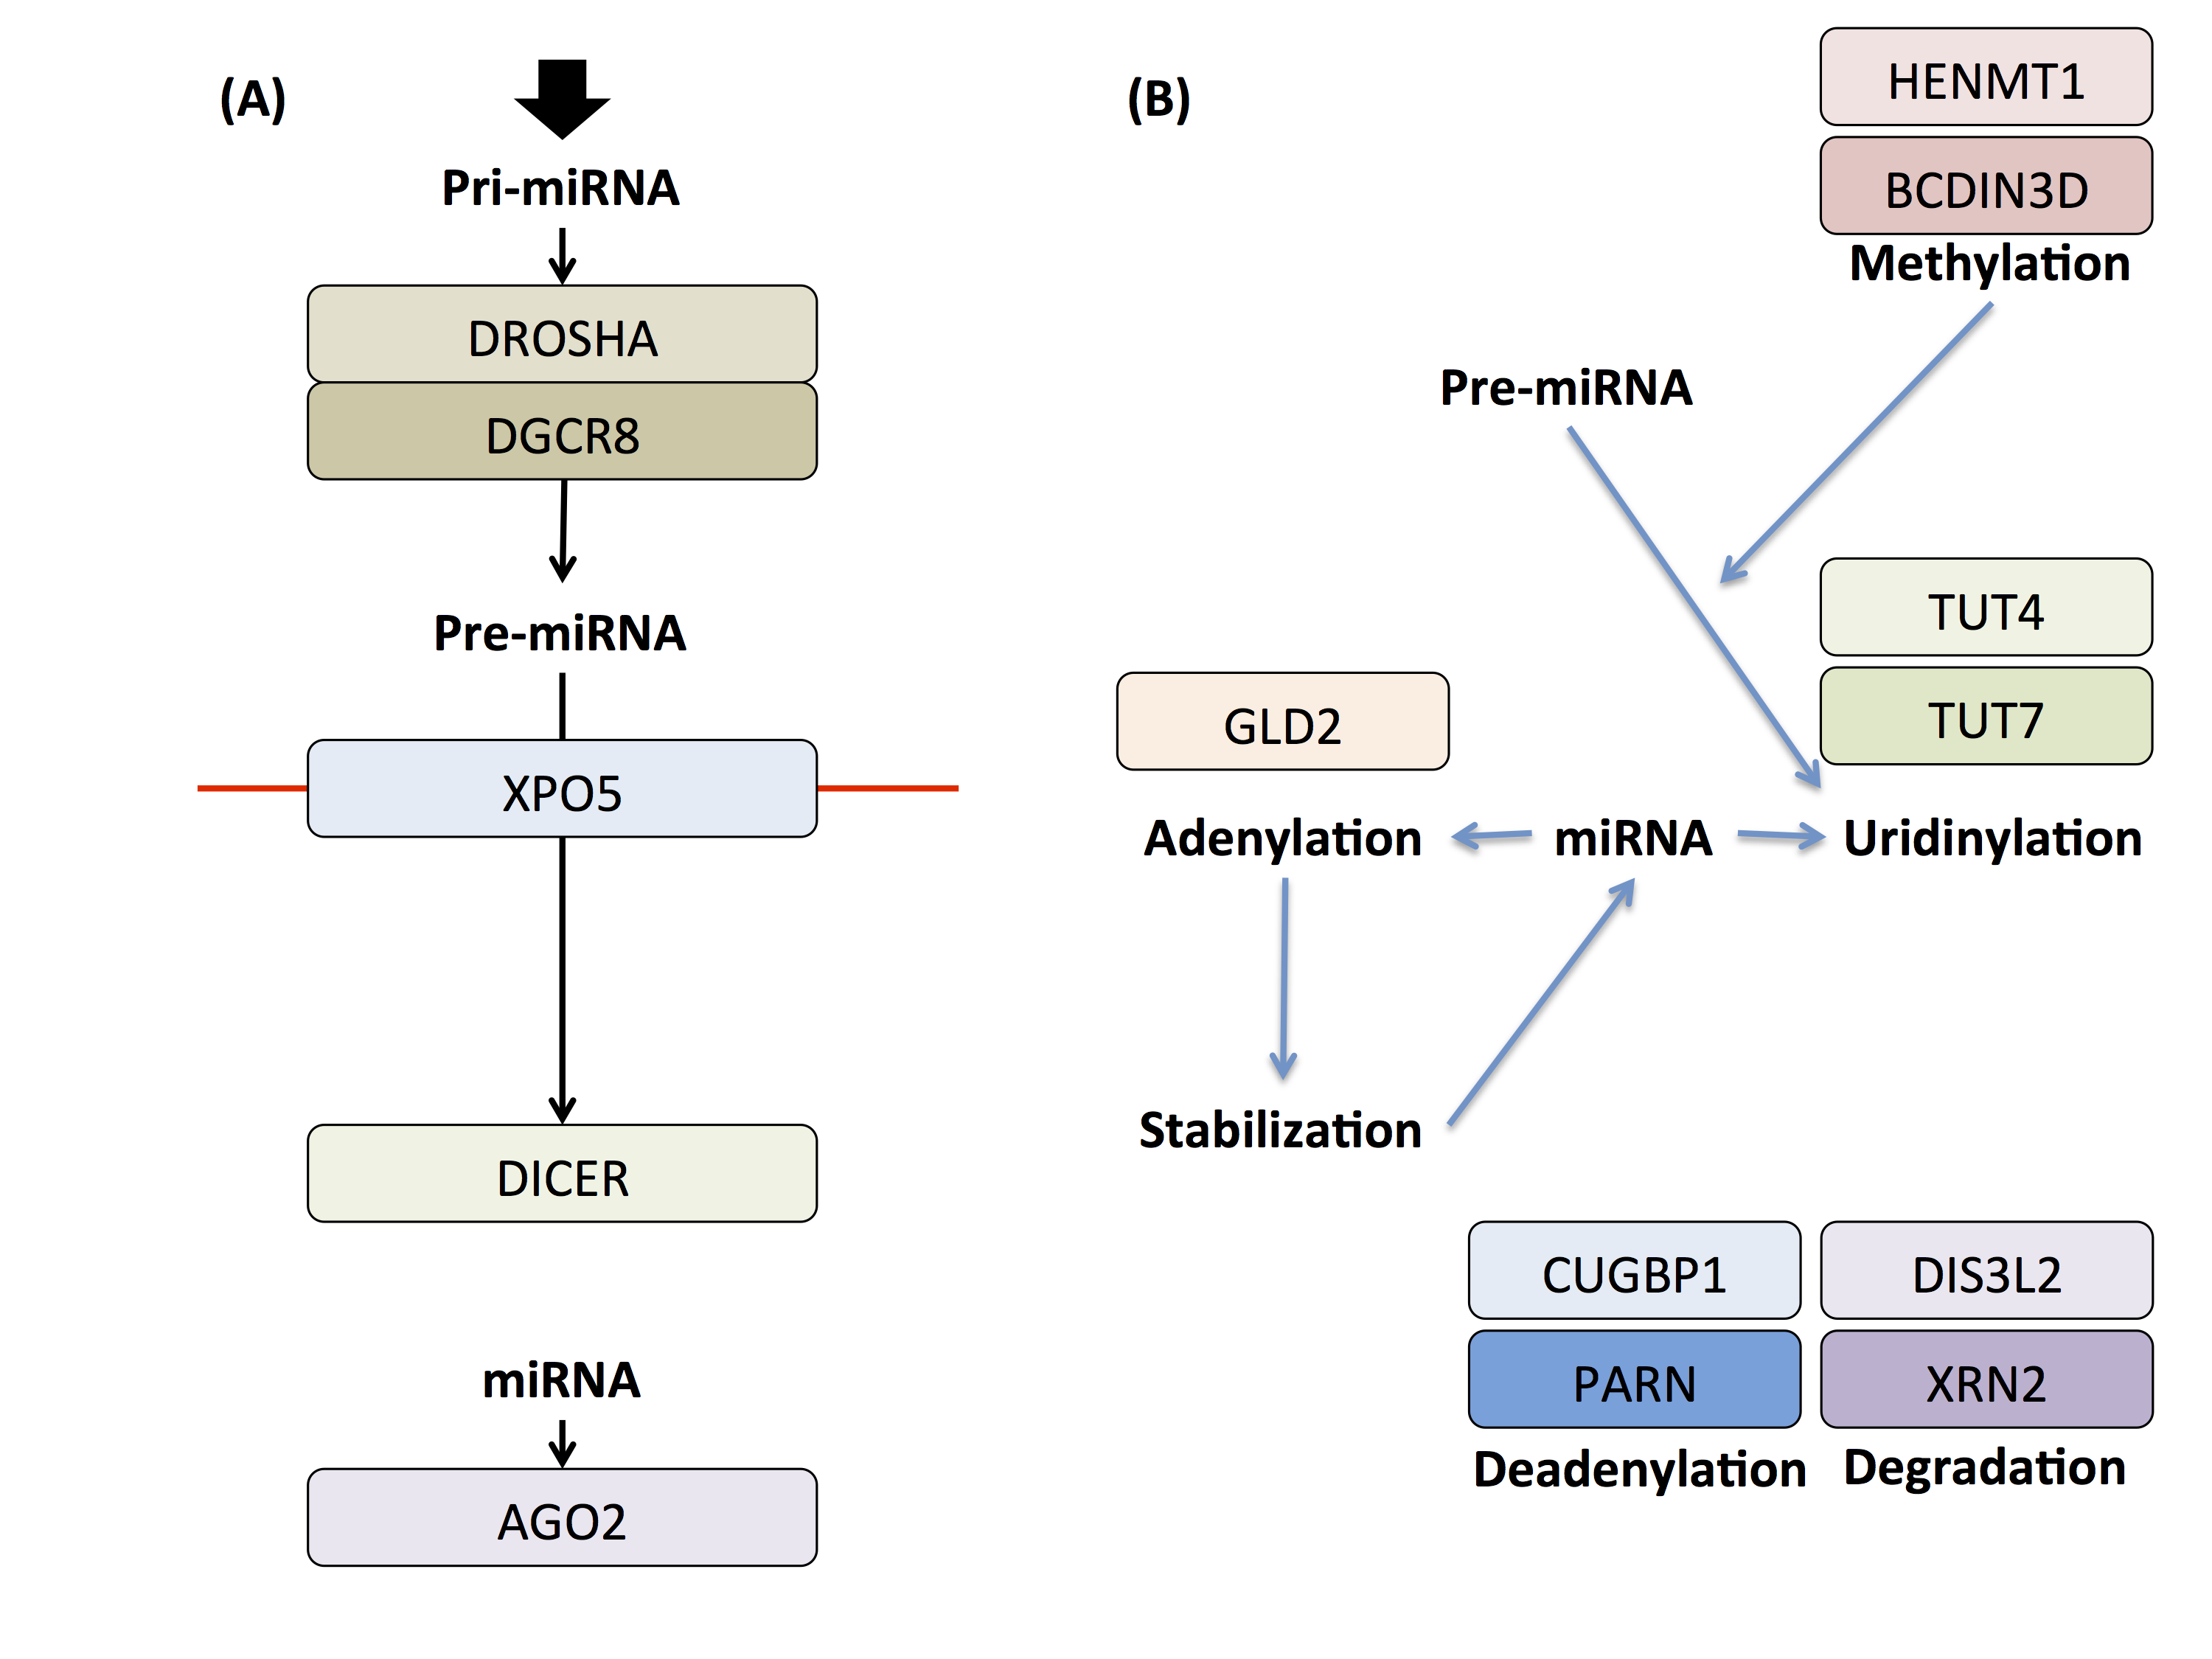

Supplement: Supplementary file 1 [file 18946616 › Supplementary_data_figures/Figure_14.tiff]

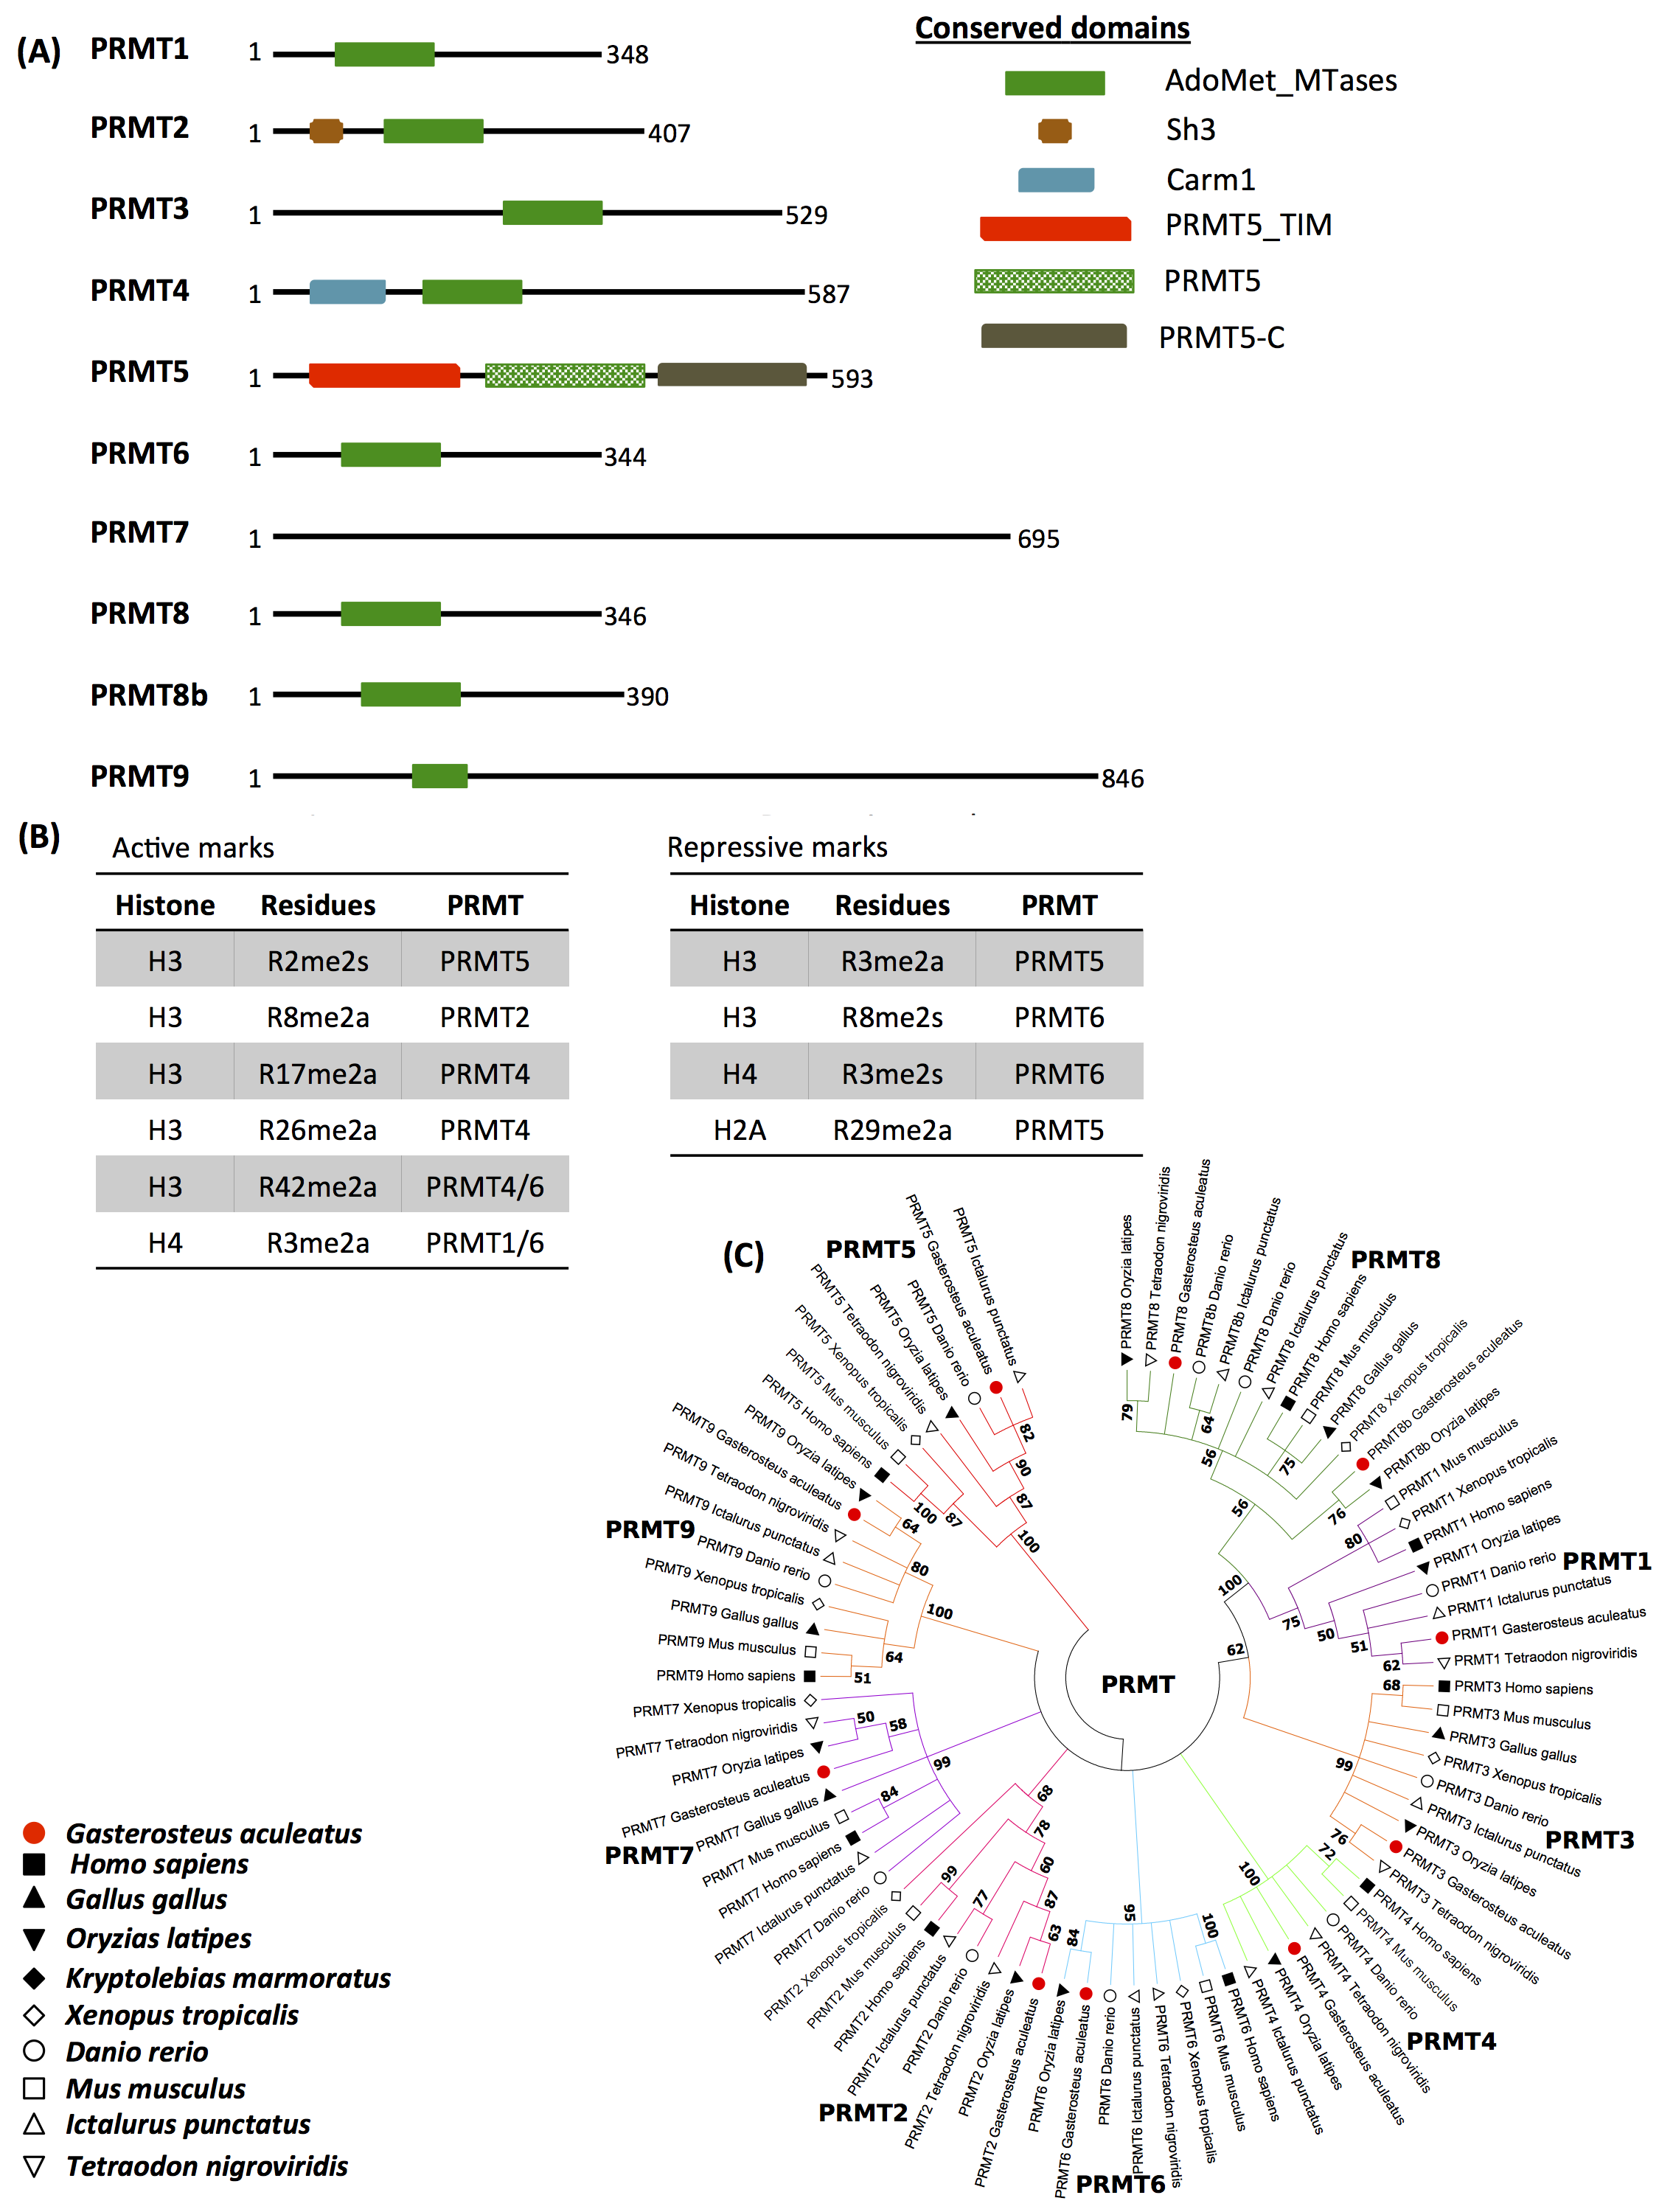

Supplement: Supplementary file 1 [file 18946616 › Supplementary_data_figures/Figure_2.tiff]

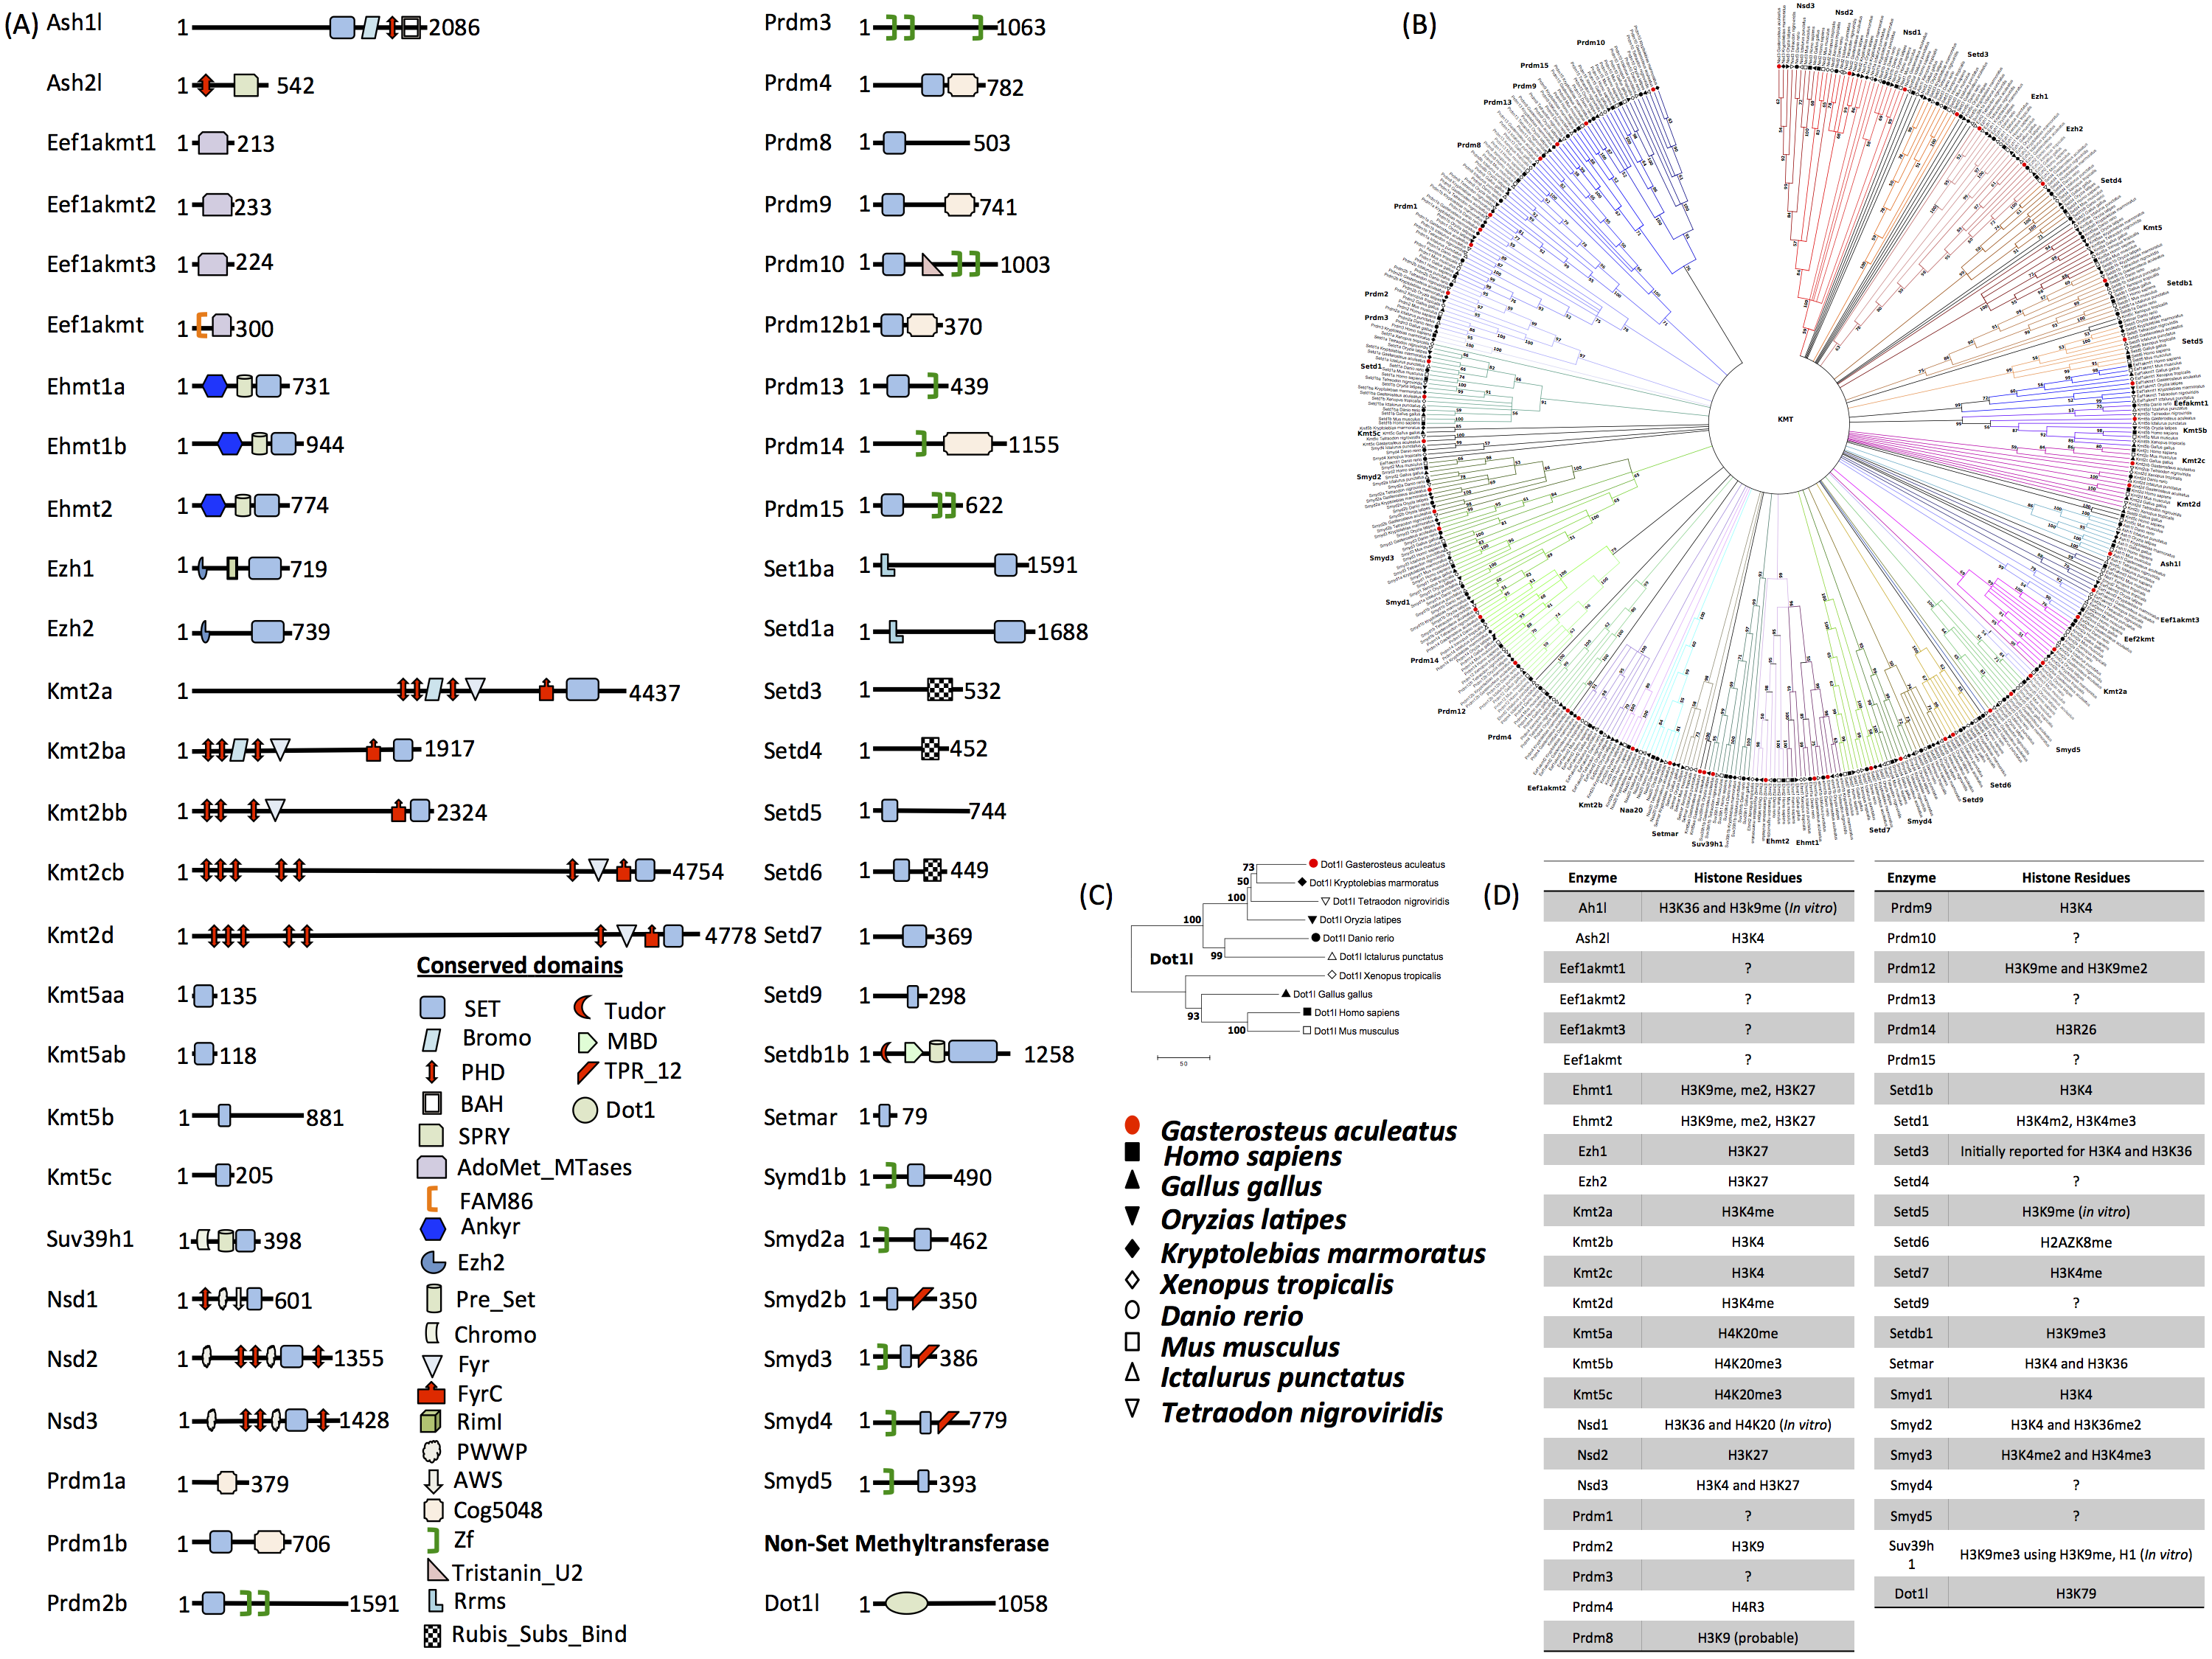

Supplement: Supplementary file 1 [file 18946616 › Supplementary_data_figures/Figure_3.tiff]

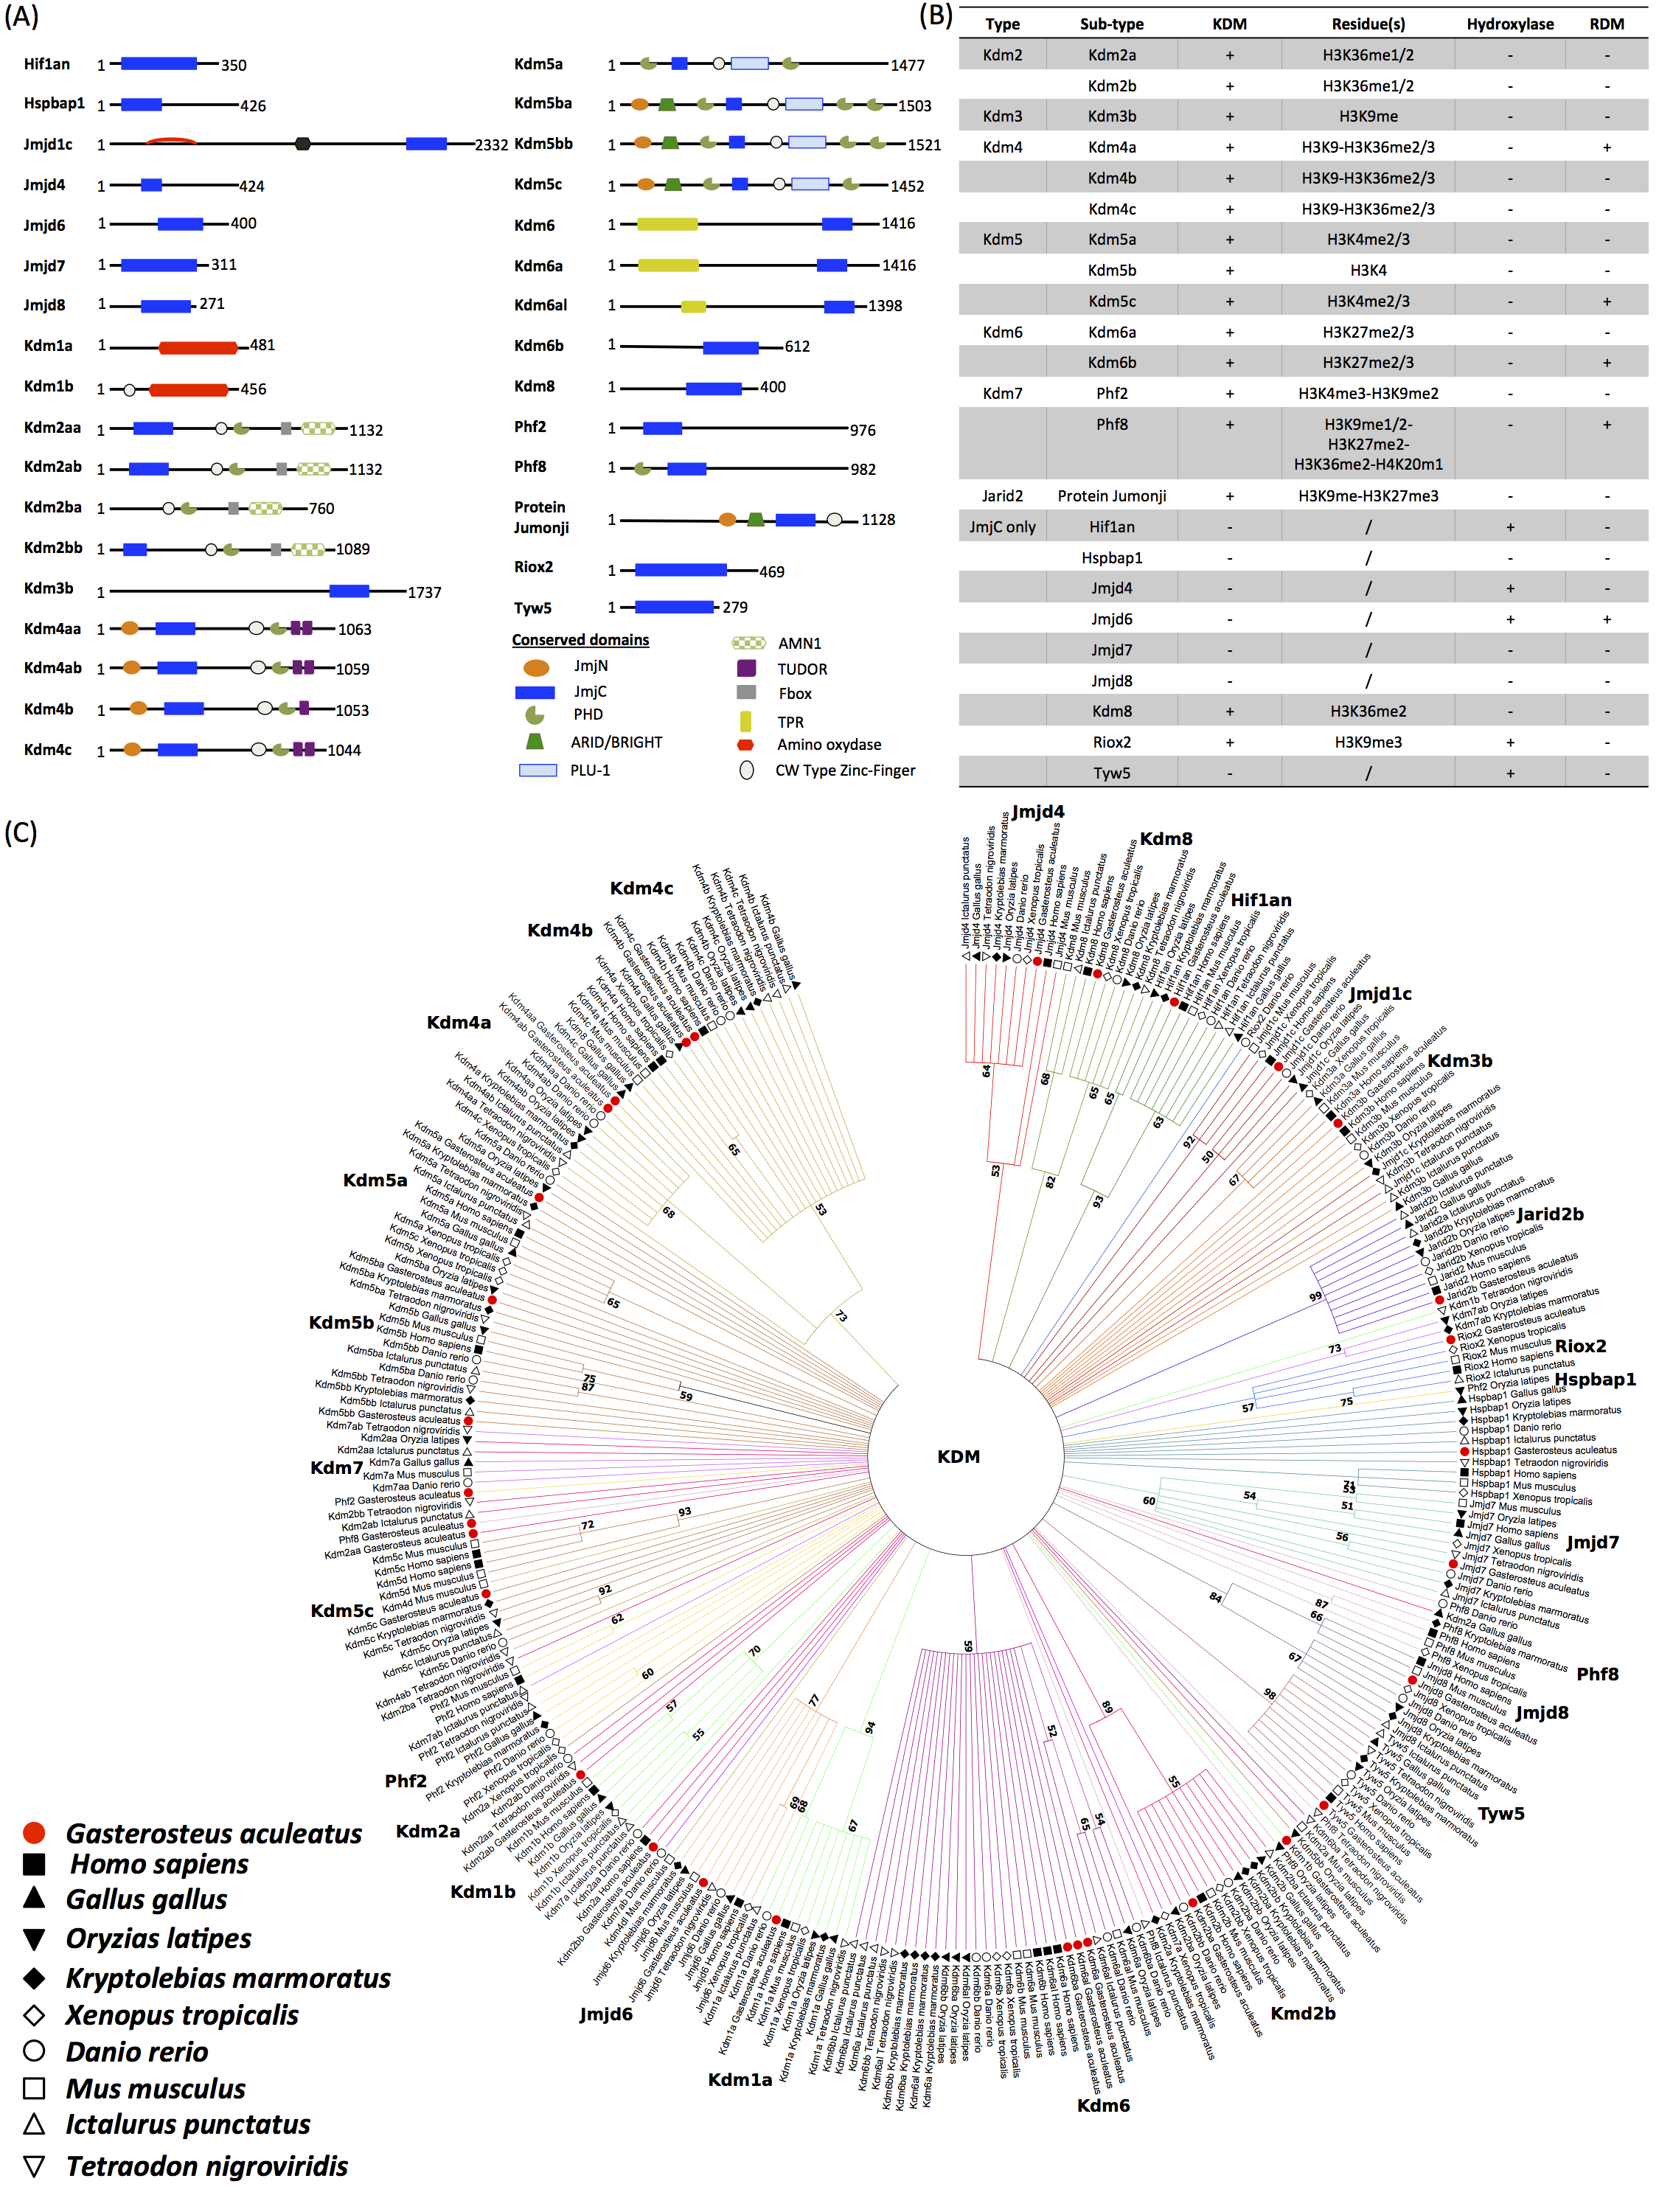

Supplement: Supplementary file 1 [file 18946616 › Supplementary_data_figures/Figure_4.tiff]

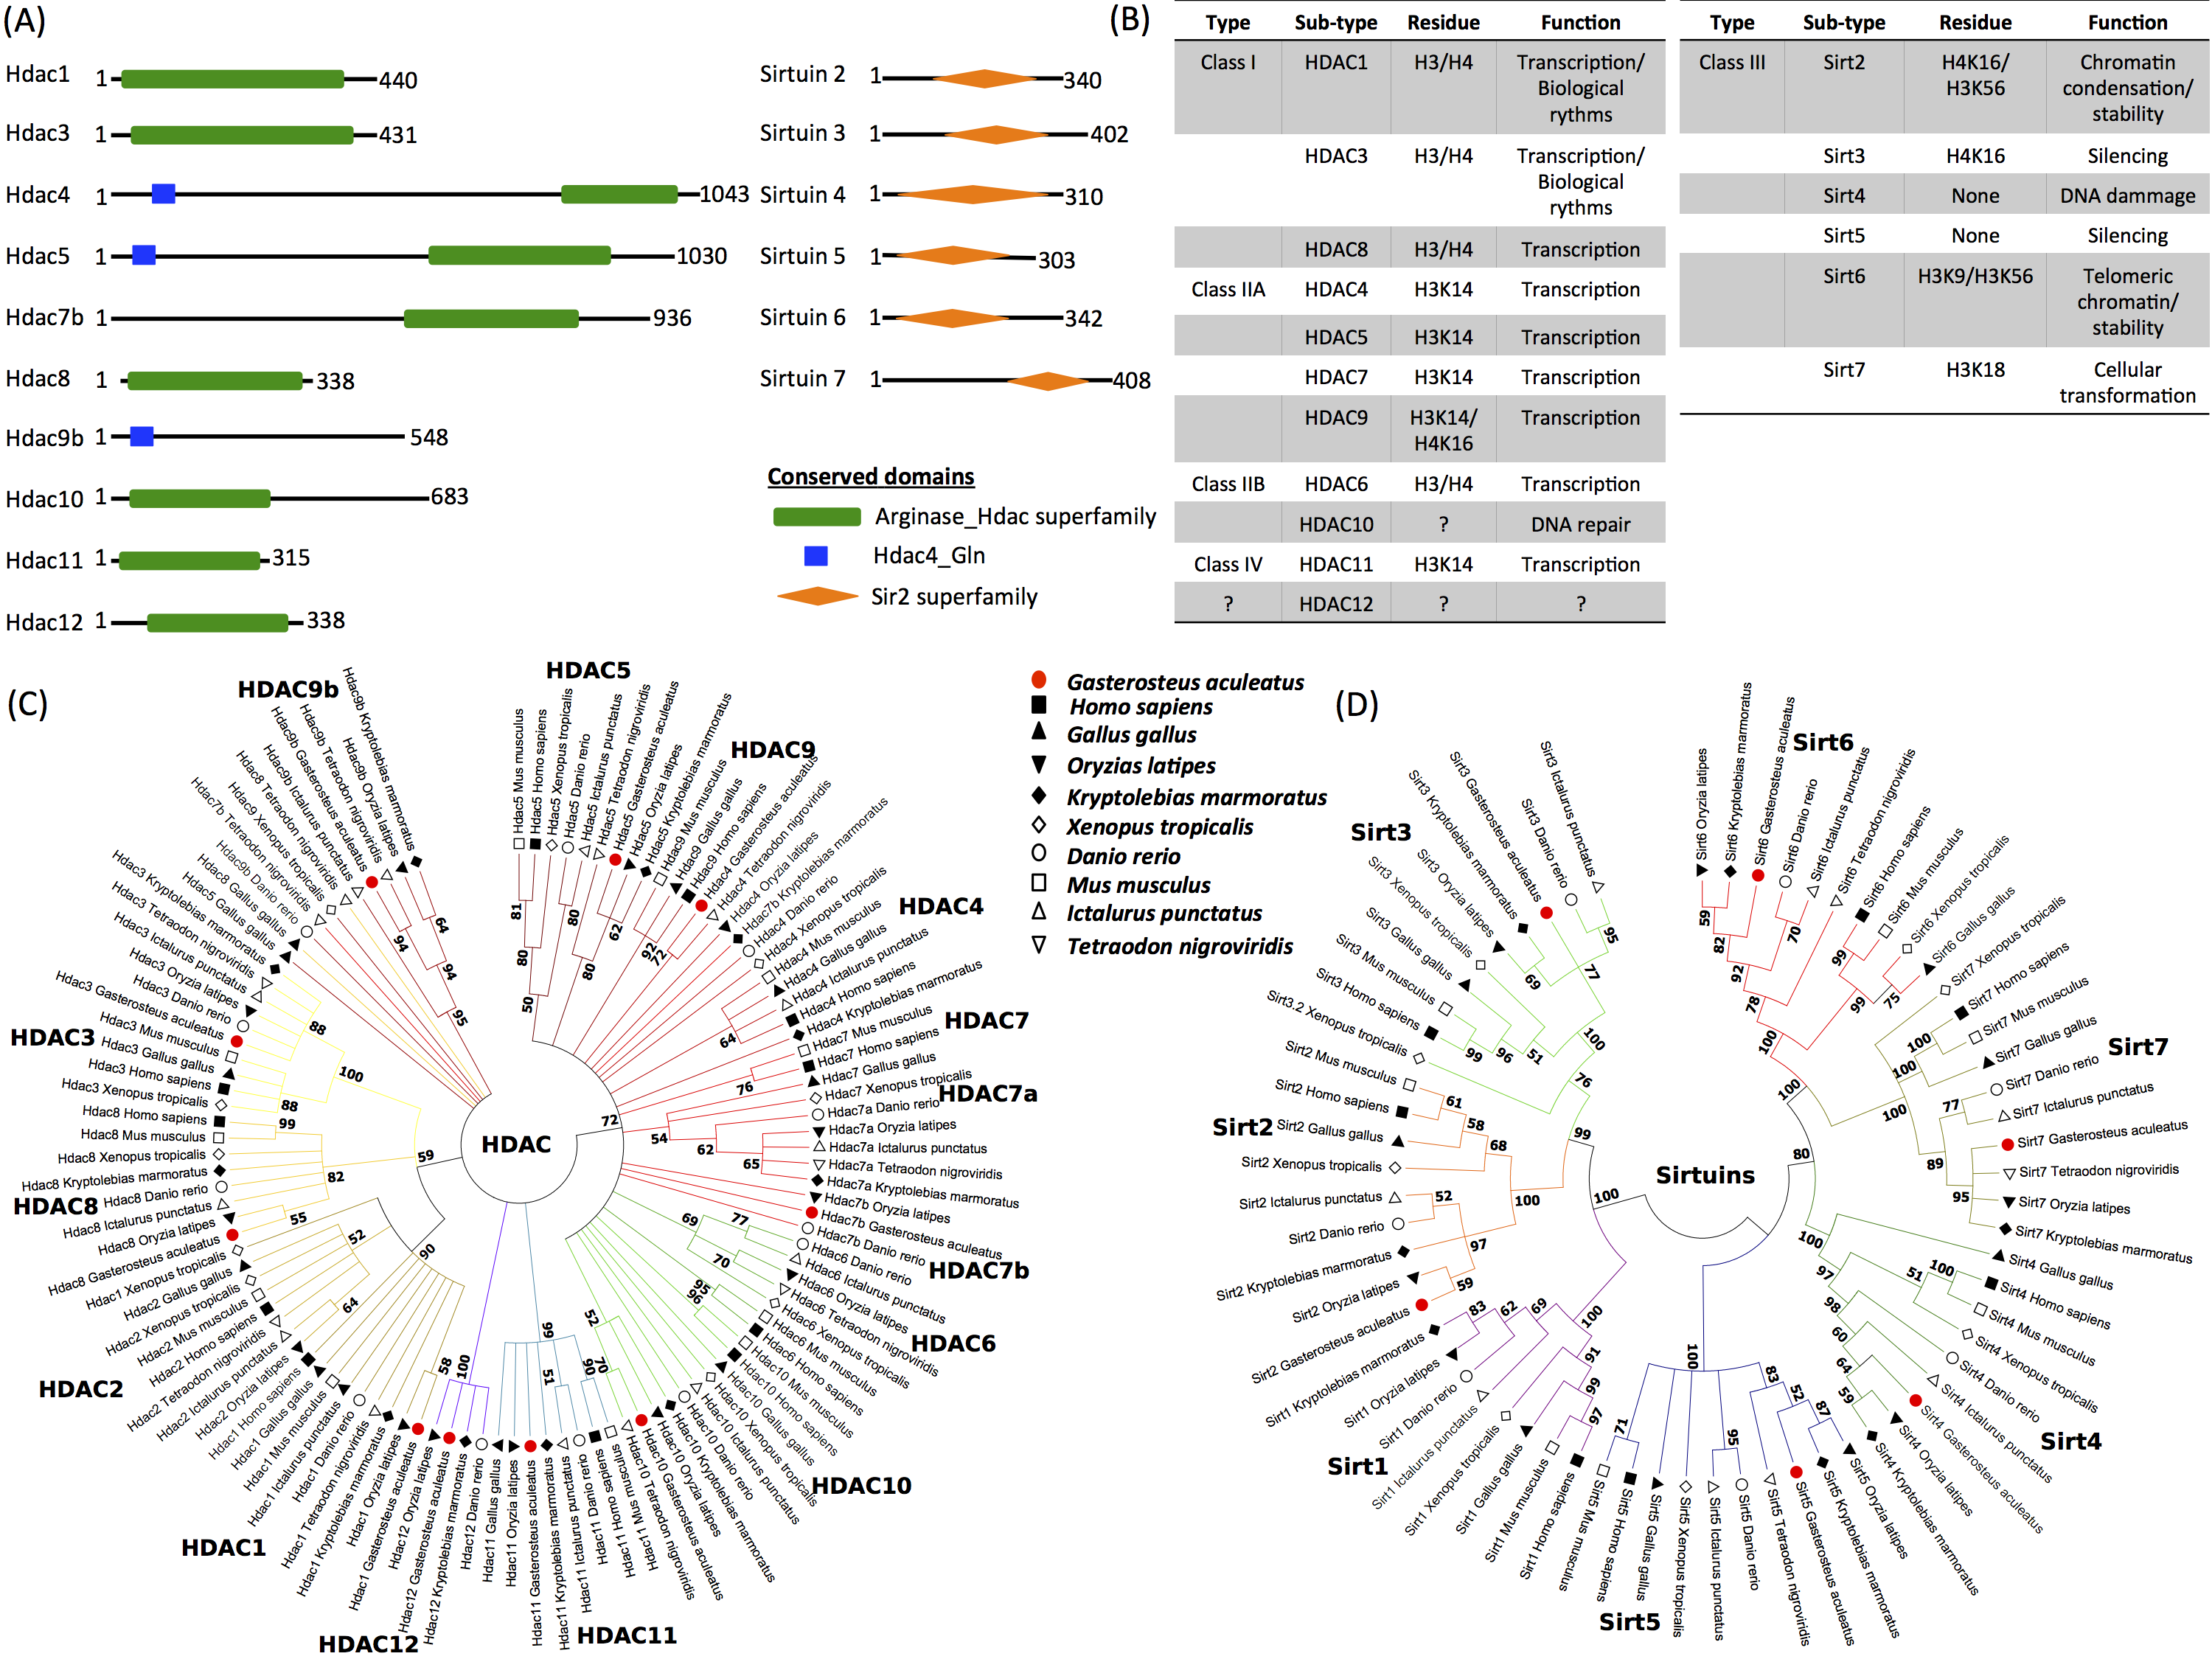

Supplement: Supplementary file 1 [file 18946616 › Supplementary_data_figures/Figure_5.tiff]

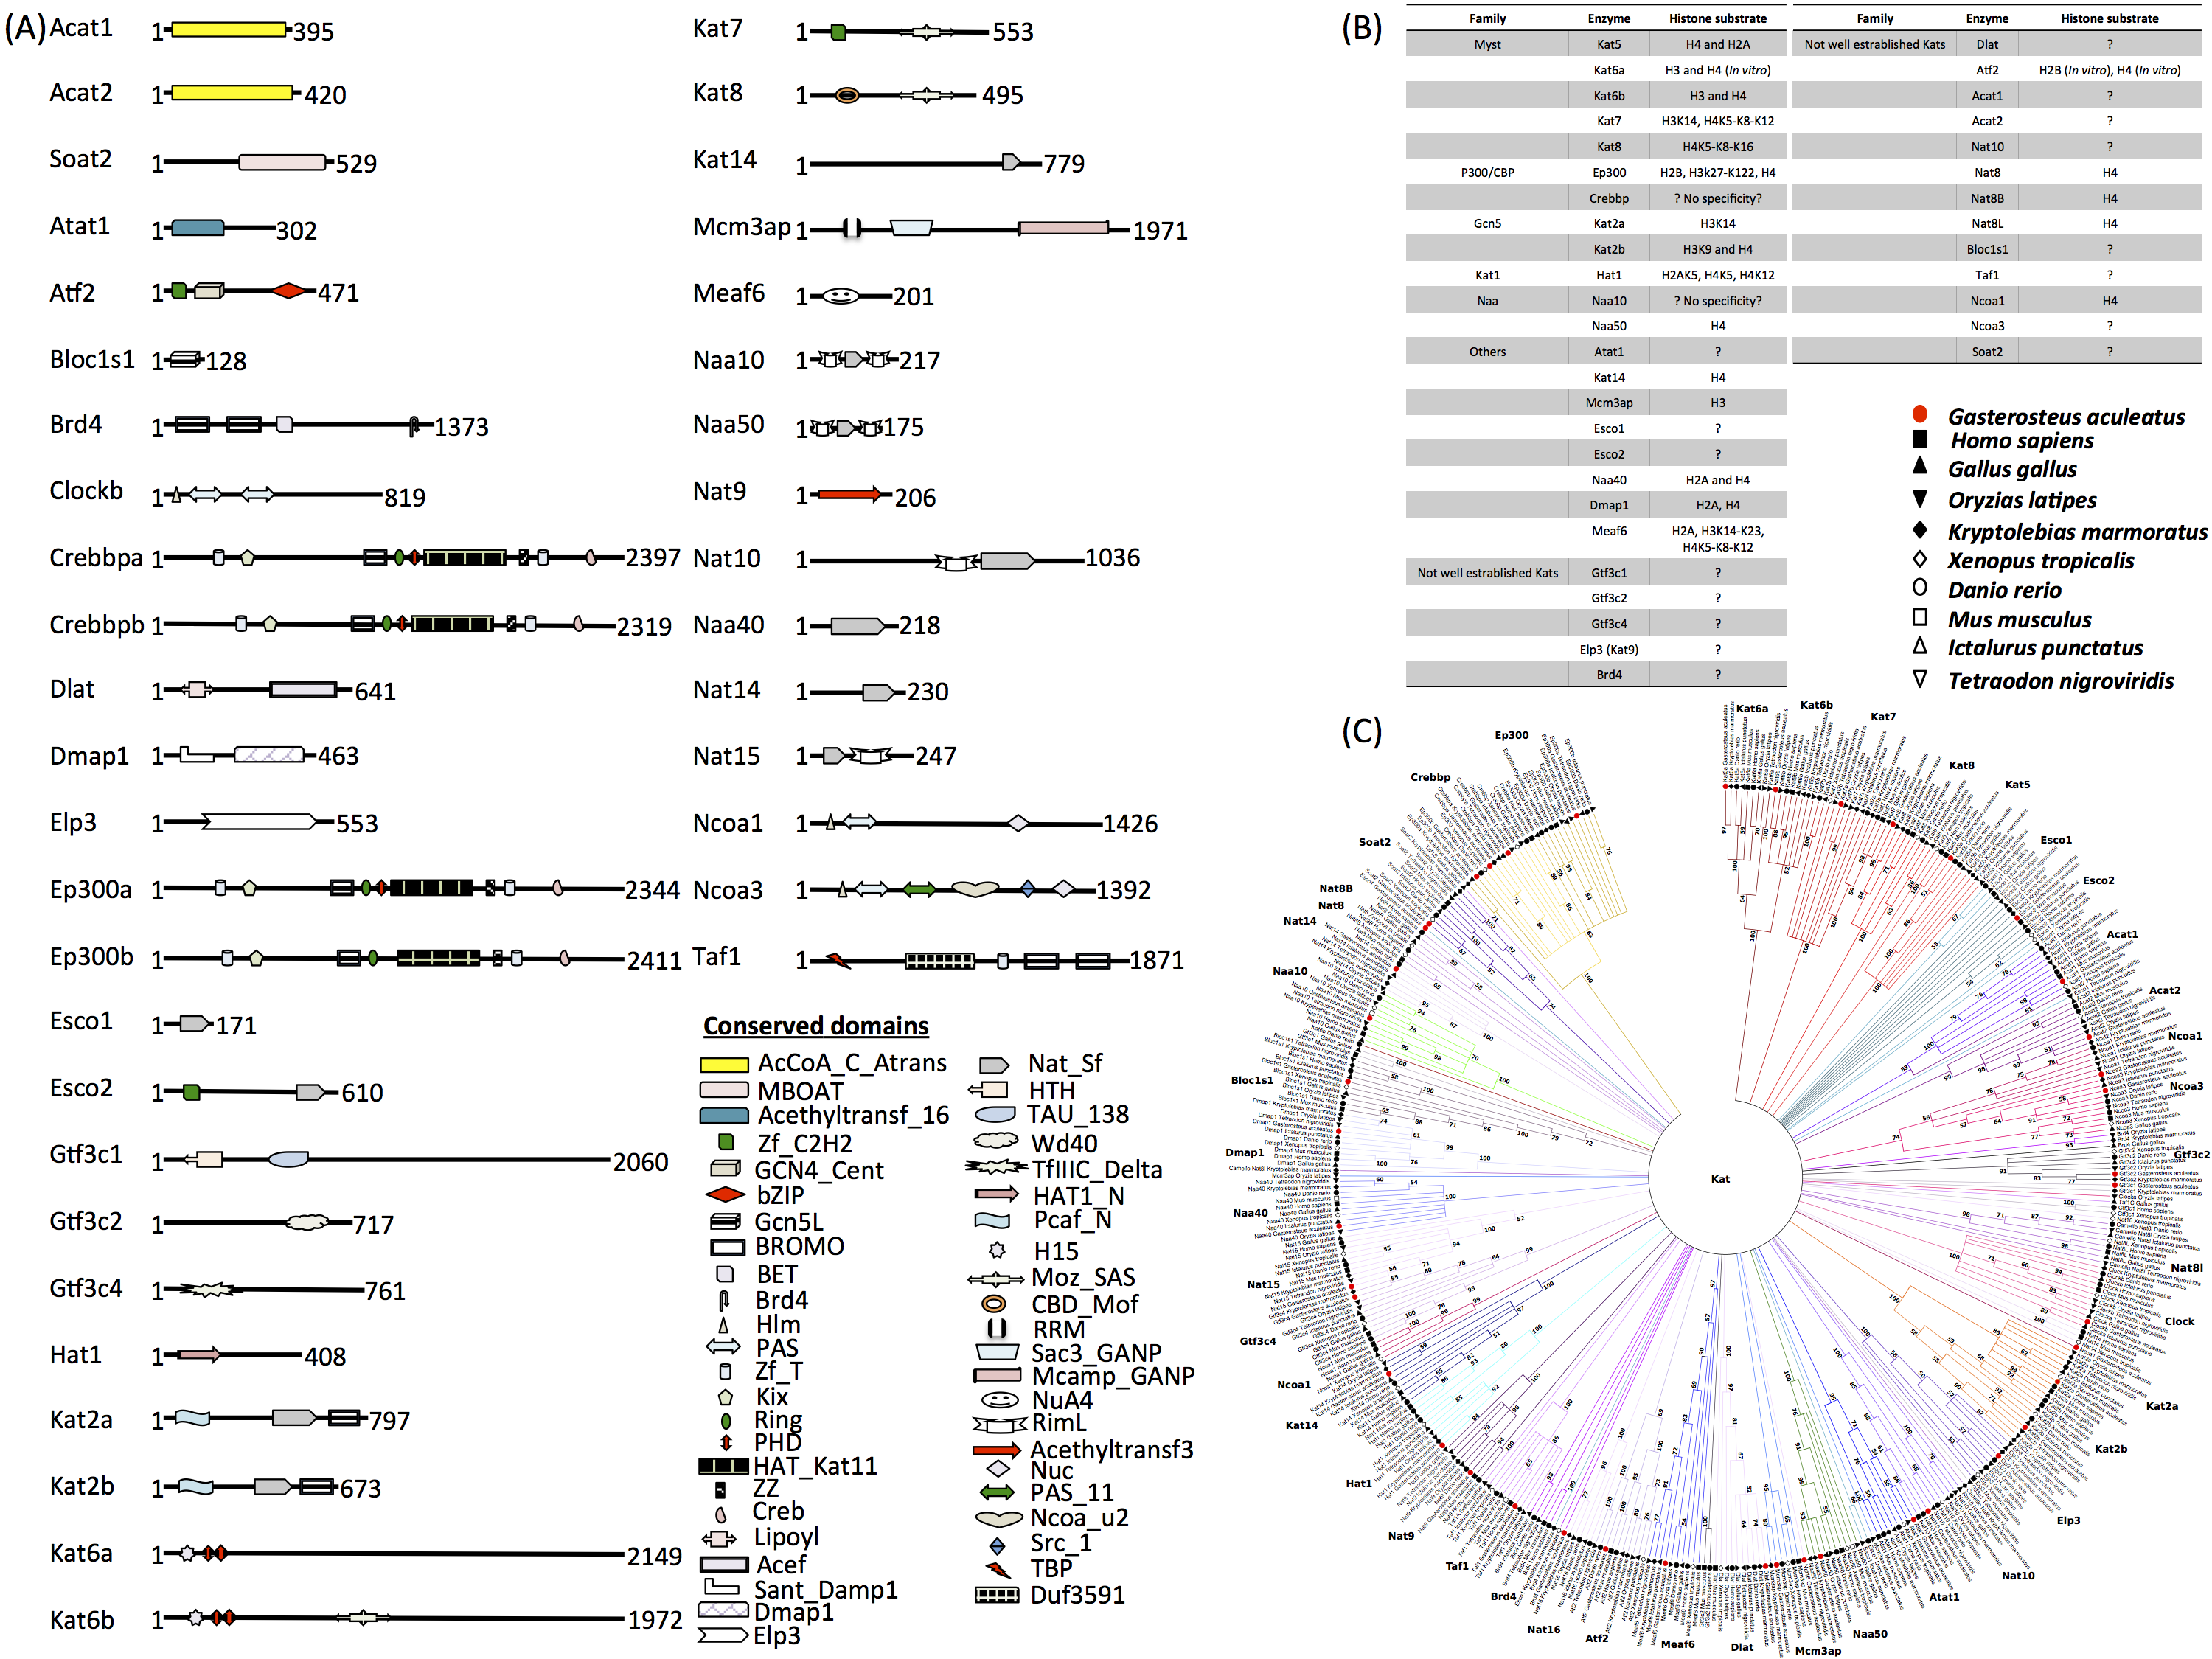

Supplement: Supplementary file 1 [file 18946616 › Supplementary_data_figures/Figure_6.tiff]

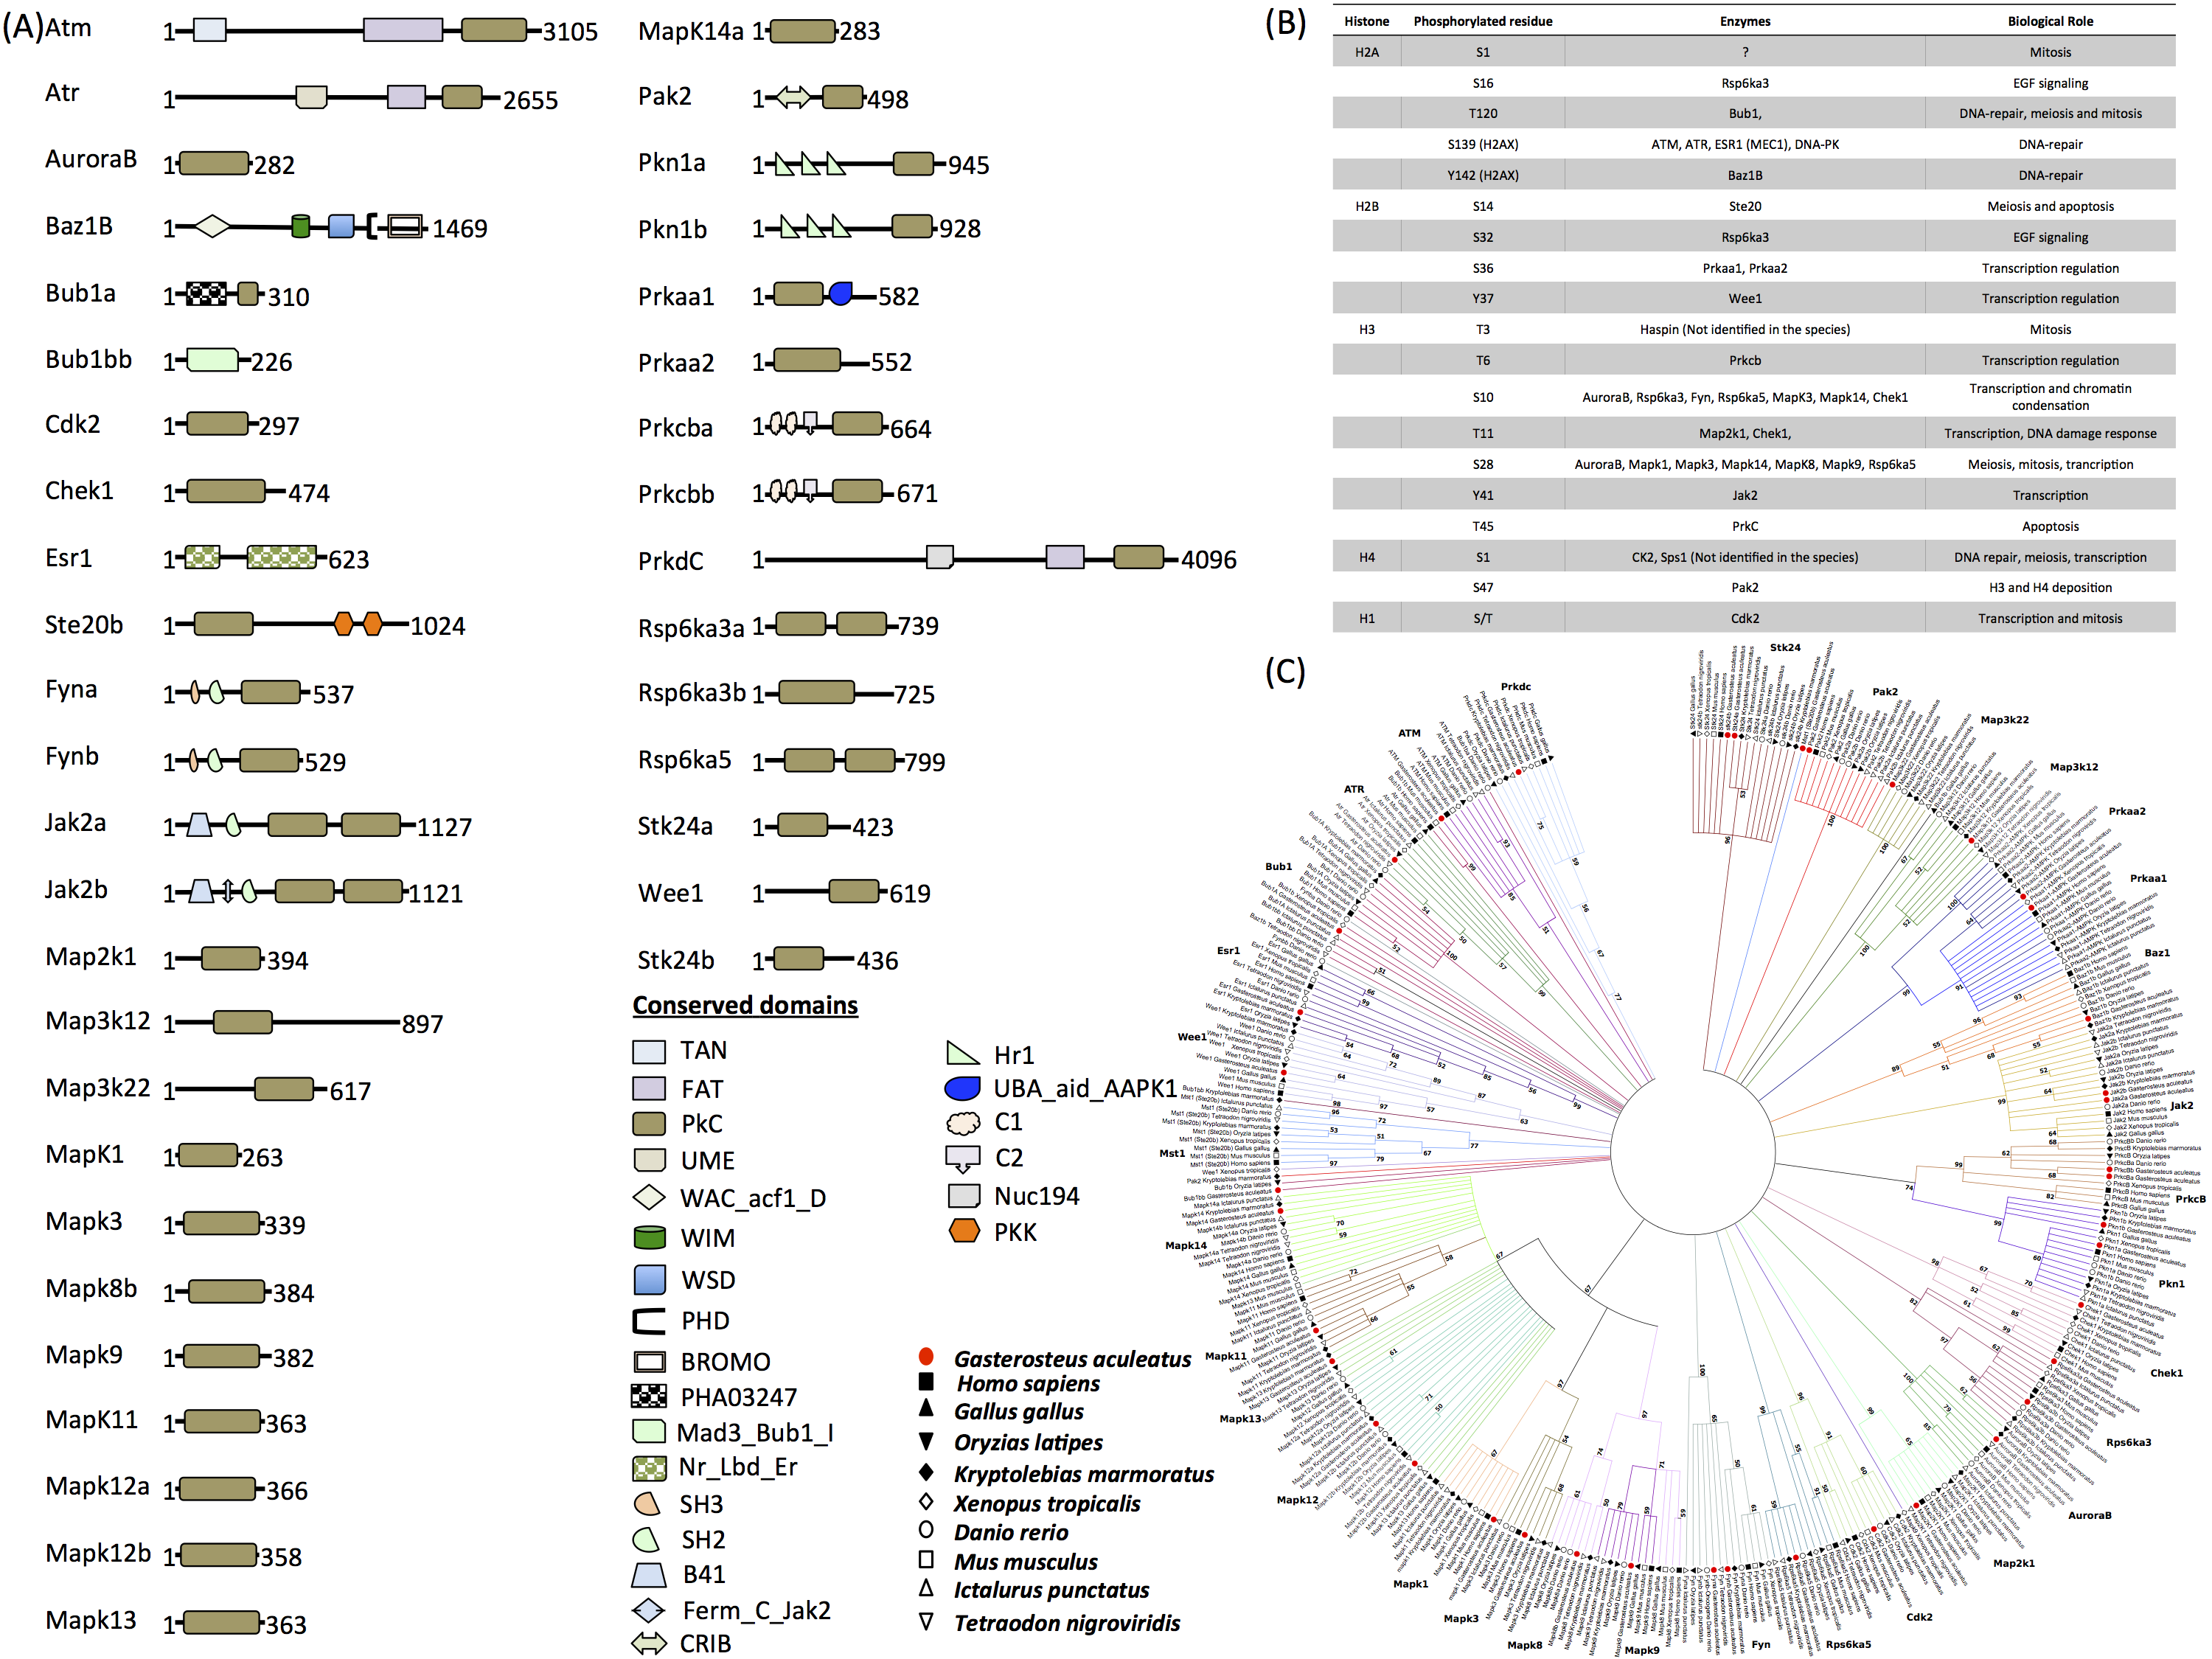

Supplement: Supplementary file 1 [file 18946616 › Supplementary_data_figures/Figure_7.tiff]

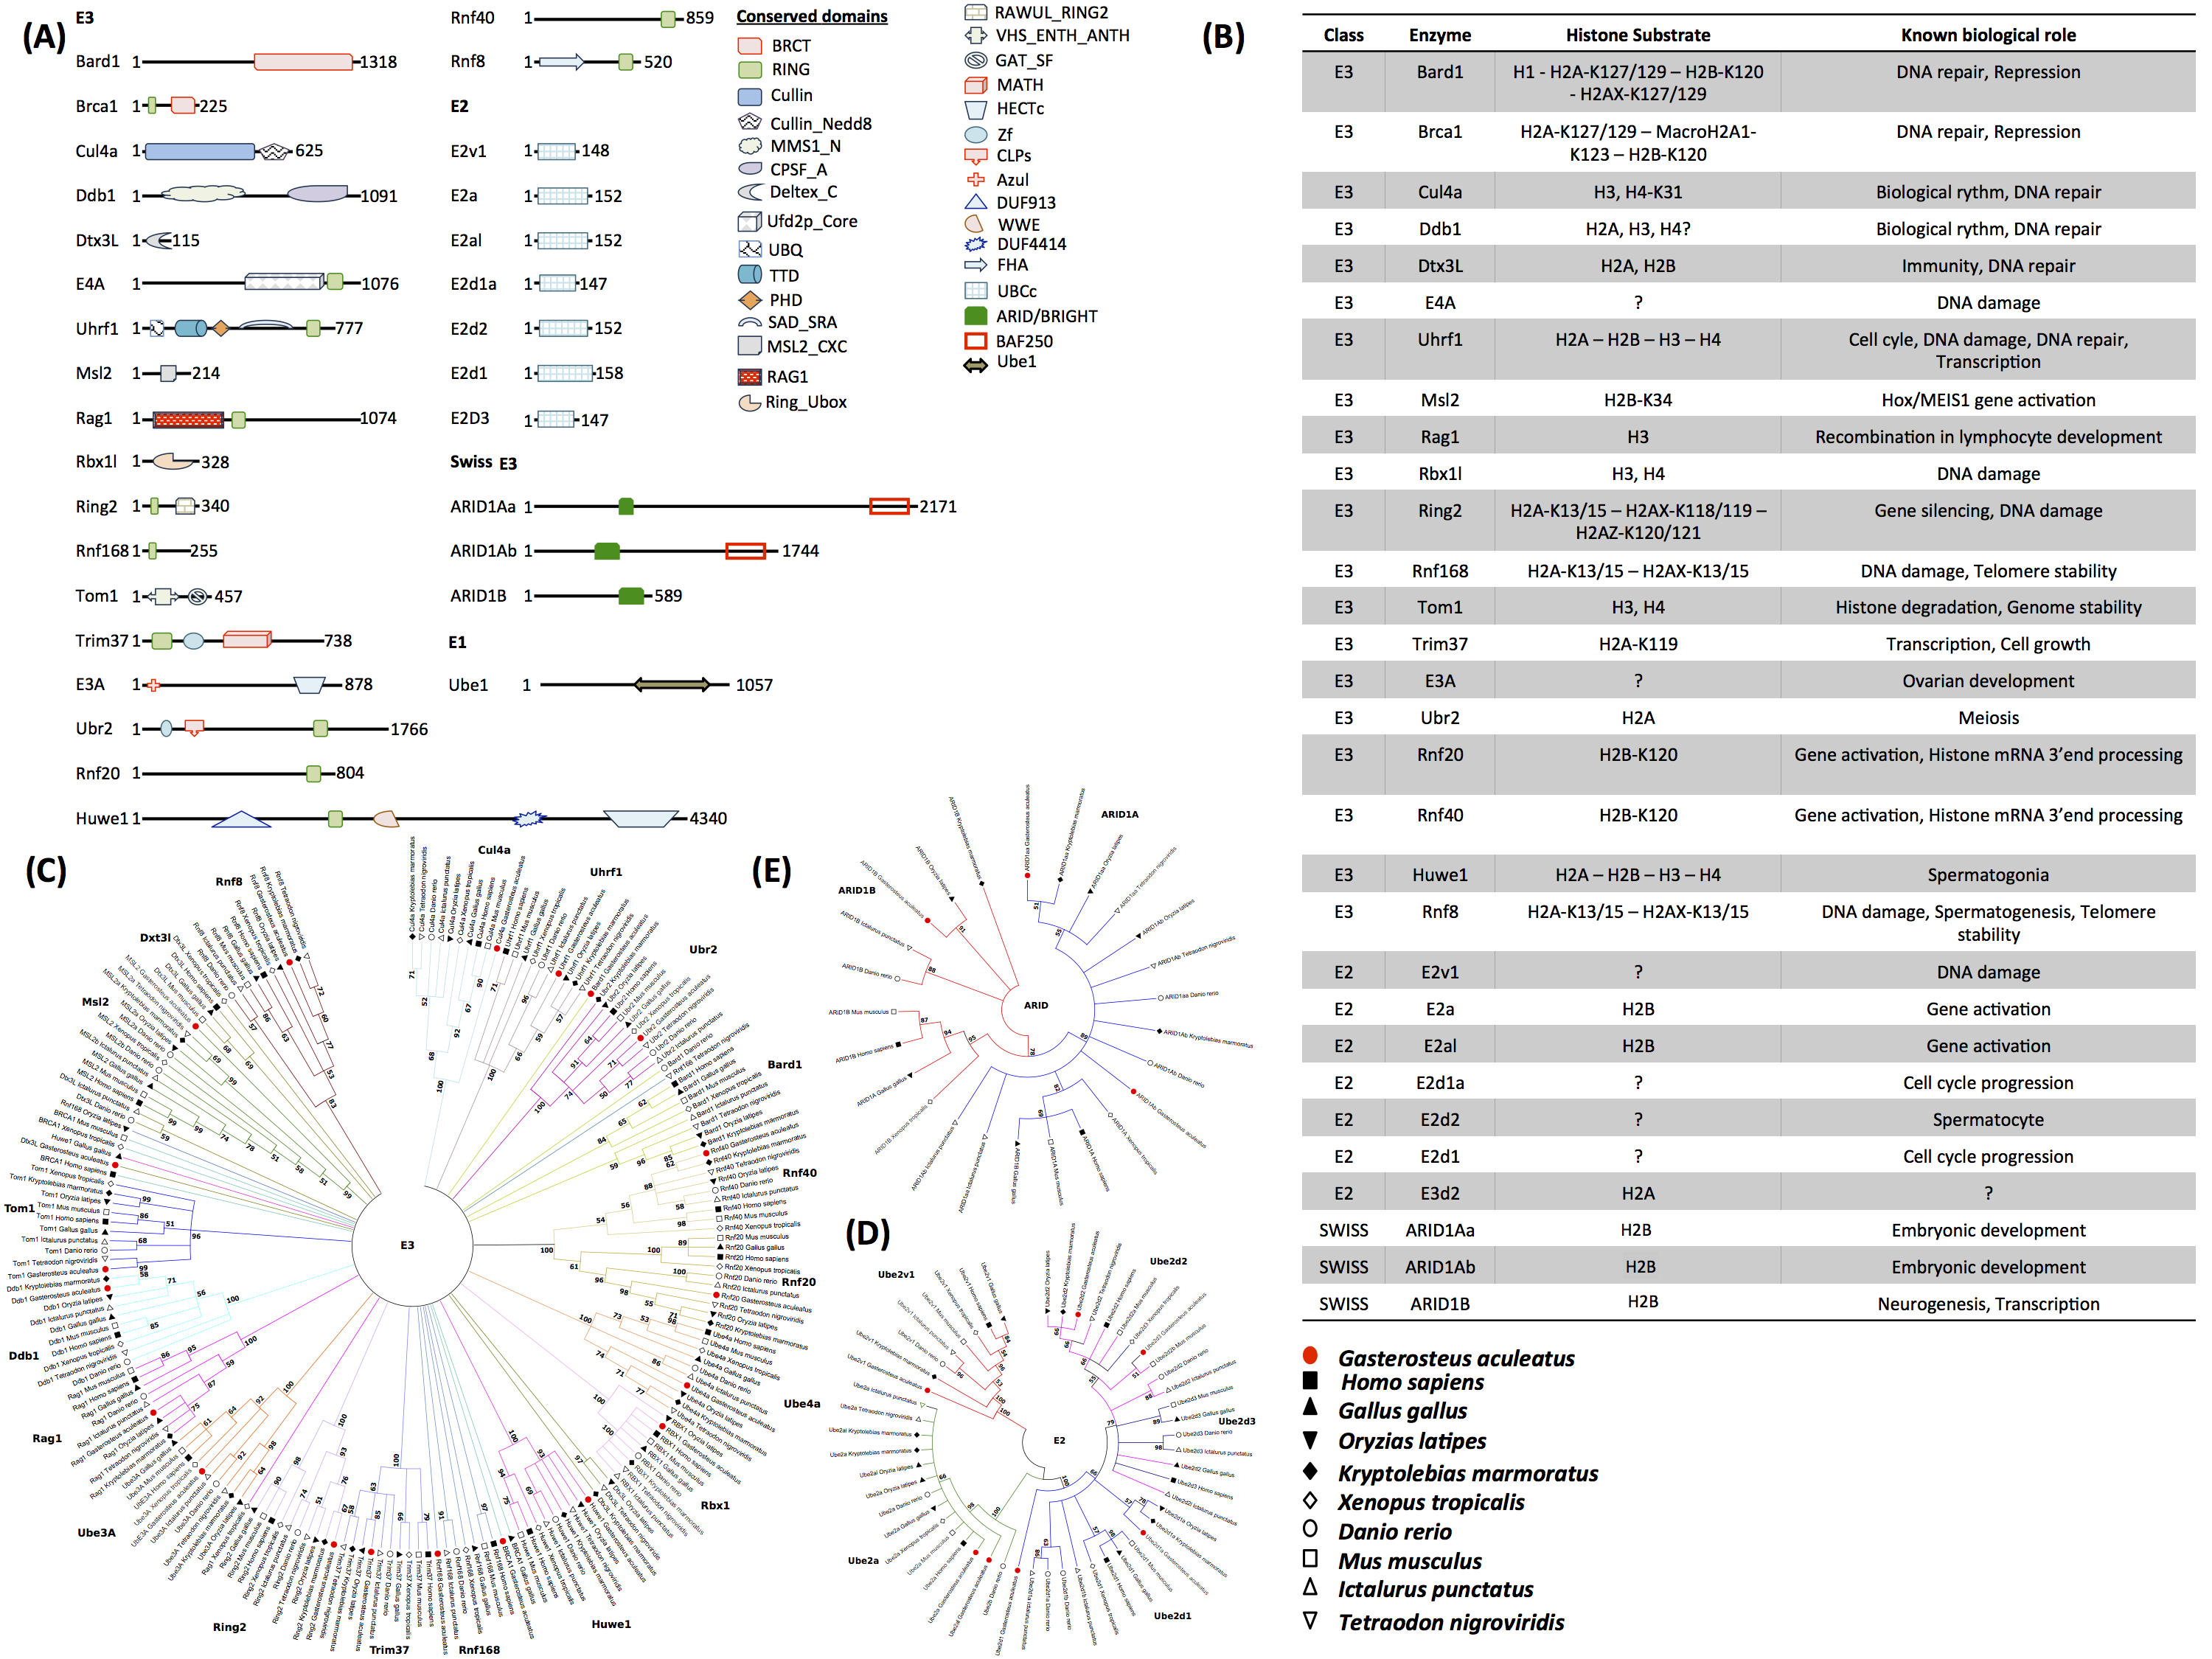

Supplement: Supplementary file 1 [file 18946616 › Supplementary_data_figures/Figure_8.tiff]

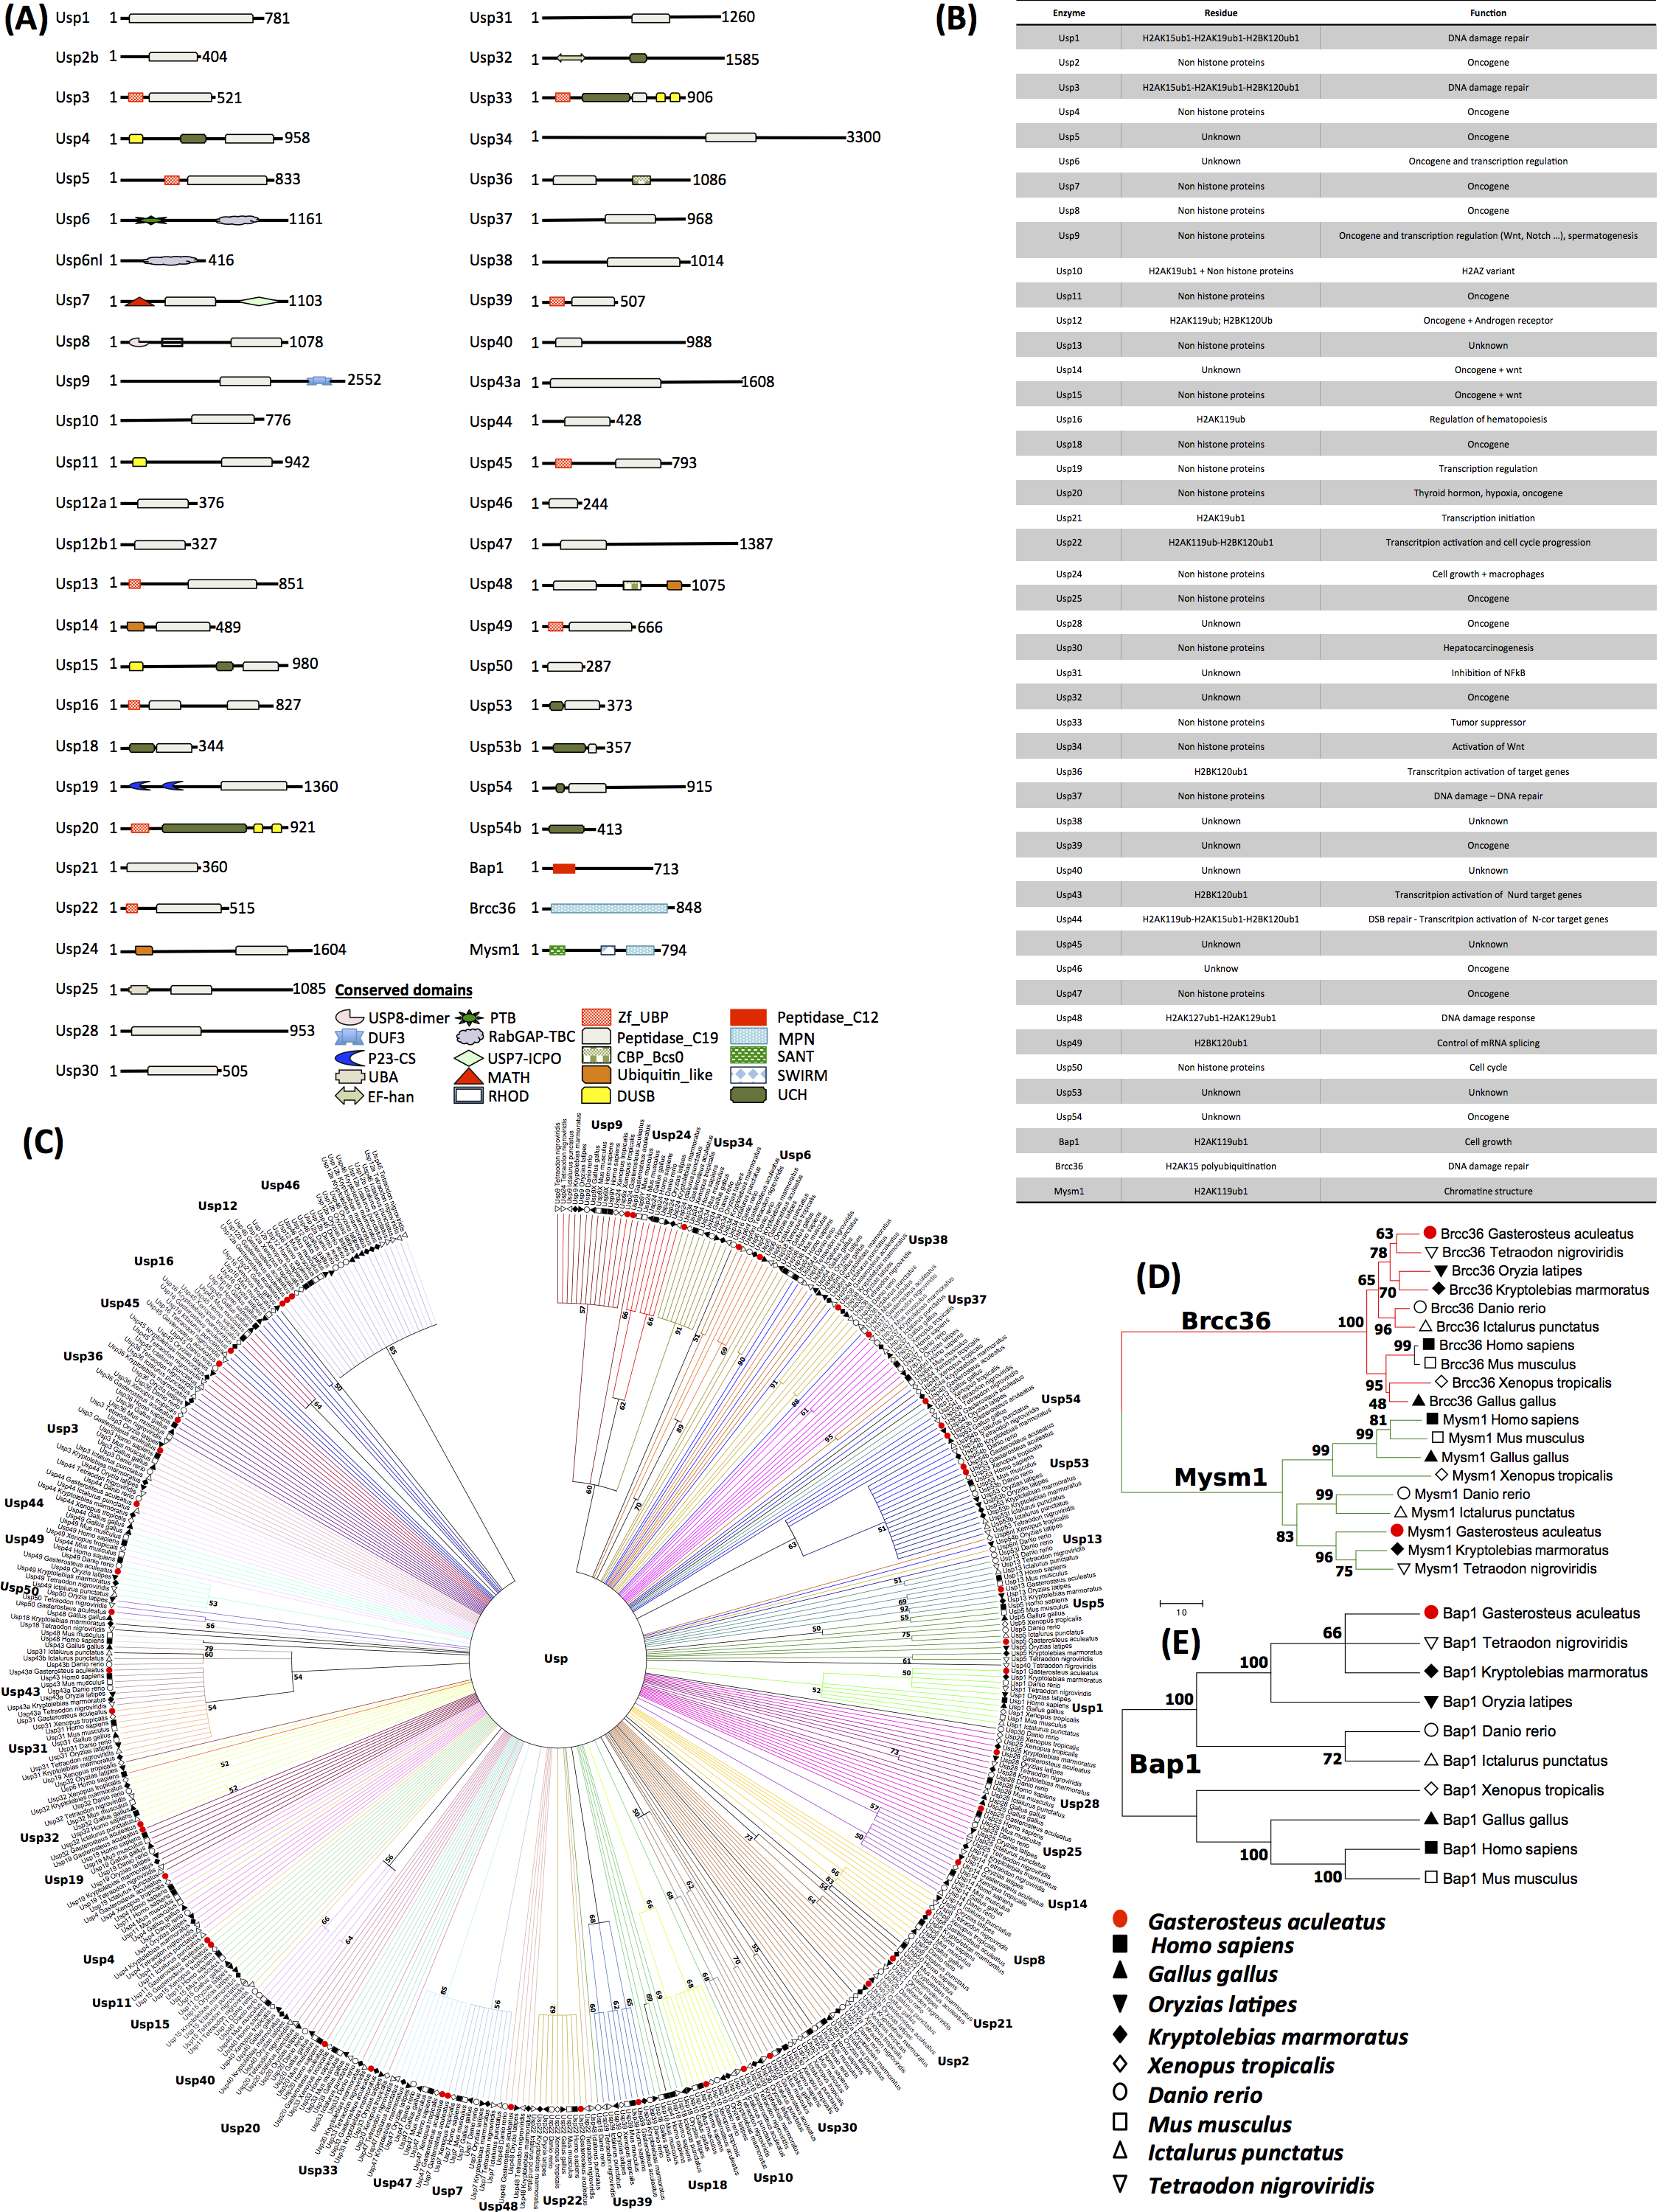

Supplement: Supplementary file 1 [file 18946616 › Supplementary_data_figures/Figure_9.tiff]
